# Supplementary material
Source: PubMed Central journal article supplement (PMC4930791)
Supplement: NIHMS788834-supplement-Spplementary_Information.pdf [file NIHMS788834-supplement-Spplementary_Information.pdf]

**Supplementary Table 3. Unadjusted amino acid omnibus test**

| Gene  | Amino acid posit | deltaDeviance | deltaDF | P       | Residues  |
|-------|------------------|---------------|---------|---------|-----------|
| HLA-A | -22              | 7.687         | 1       | -2.255  | V,x       |
| HLA-A | -20              | 7.687         | 1       | -2.255  | A,x       |
| HLA-A | -15              | 65.055        | 2       | -14.126 | V,L,x     |
| HLA-A | -11              | 84.832        | 2       | -18.421 | S,L,x     |
| HLA-A | -2               | 7.687         | 1       | -2.255  | W,x       |
| HLA-A | 9                | 191.951       | 3       | -40.636 | F,S,Y,T   |
| HLA-A | 12               | 14.677        | 1       | -3.894  | V,M       |
| HLA-A | 17               | 28.501        | 1       | -7.028  | R,S       |
| HLA-A | 19               | NA            | NA      | NA      | E         |
| HLA-A | 31               | NA            | NA      | NA      | T         |
| HLA-A | 35               | NA            | NA      | NA      | R         |
| HLA-A | 43               | 30.825        | 1       | -7.549  | Q,R       |
| HLA-A | 44               | 26.355        | 1       | -6.546  | R,K       |
| HLA-A | 56               | 3.993         | 1       | -1.340  | G,R       |
| HLA-A | 62               | 171.202       | 4       | -35.239 | G,Q,E,R,L |
| HLA-A | 63               | 77.957        | 2       | -16.928 | E,N,Q     |
| HLA-A | 65               | 48.385        | 1       | -11.456 | R,G       |
| HLA-A | 66               | 135.241       | 1       | -30.534 | K,N       |
| HLA-A | 67               | 26.507        | 1       | -6.581  | V,M       |
| HLA-A | 70               | 187.156       | 1       | -41.877 | H,Q       |
| HLA-A | 73               | 10.942        | 1       | -3.027  | T,I       |
| HLA-A | 74               | 60.232        | 1       | -14.074 | H,D       |
| HLA-A | 76               | 24.772        | 2       | -5.379  | V,A,E     |
| HLA-A | 77               | 122.032       | 2       | -26.499 | D,N,S     |
| HLA-A | 79               | 0.755         | 1       | -0.415  | G,R       |
| HLA-A | 80               | 0.755         | 1       | -0.415  | T,I       |
| HLA-A | 81               | 0.755         | 1       | -0.415  | L,A       |
| HLA-A | 82               | 0.755         | 1       | -0.415  | R,L       |
| HLA-A | 83               | 0.755         | 1       | -0.415  | G,R       |
| HLA-A | 90               | 13.391        | 1       | -3.597  | A,D       |
| HLA-A | 95               | 150.706       | 2       | -32.725 | V,I,L     |
| HLA-A | 97               | 16.240        | 2       | -3.526  | R,I,M     |
| HLA-A | 99               | 48.385        | 1       | -11.456 | Y,F       |
| HLA-A | 102              | 0.887         | 1       | -0.461  | D,H       |
| HLA-A | 105              | 47.513        | 1       | -11.262 | S,P       |
| HLA-A | 107              | 60.143        | 1       | -14.055 | W,G       |
| HLA-A | 109              | 52.441        | 1       | -12.353 | F,L       |
| HLA-A | 114              | 222.727       | 3       | -47.287 | H,R,Q,E   |
| HLA-A | 116              | 171.822       | 2       | -37.311 | Y,D,H     |
| HLA-A | 127              | 107.455       | 1       | -24.451 | K,N       |

|       |     |         |    |          |           |
|-------|-----|---------|----|----------|-----------|
| HLA-A | 142 | 40.099  | 1  | -9.617   | T,I       |
| HLA-A | 144 | 101.371 | 1  | -23.118  | K,Q       |
| HLA-A | 145 | 40.099  | 1  | -9.617   | H,R       |
| HLA-A | 149 | 46.158  | 1  | -10.962  | A,T       |
| HLA-A | 150 | 26.507  | 1  | -6.581   | A,V       |
| HLA-A | 151 | 52.266  | 1  | -12.315  | H,R       |
| HLA-A | 152 | 187.731 | 4  | -38.788  | V,A,E,W,R |
| HLA-A | 156 | 48.639  | 3  | -9.808   | L,R,W,Q   |
| HLA-A | 158 | 26.507  | 1  | -6.581   | A,V       |
| HLA-A | 161 | 27.010  | 1  | -6.694   | E,D       |
| HLA-A | 163 | 14.667  | 1  | -3.892   | T,R       |
| HLA-A | 166 | 83.370  | 1  | -19.167  | E,D       |
| HLA-A | 167 | 83.370  | 1  | -19.167  | W,G       |
| HLA-A | 171 | 0.767   | 1  | -0.419   | Y,H       |
| HLA-A | 184 | 0.471   | 1  | -0.308   | A,P       |
| HLA-A | 186 | 0.767   | 1  | -0.419   | K,R       |
| HLA-A | 193 | 3.364   | 1  | -1.176   | A,P       |
| HLA-A | 194 | 3.364   | 1  | -1.176   | V,I       |
| HLA-A | 207 | 3.364   | 1  | -1.176   | S,G       |
| HLA-A | 245 | 10.464  | 1  | -2.915   | A,V       |
| HLA-A | 246 | 130.641 | 1  | -29.528  | A,S       |
| HLA-A | 253 | 3.364   | 1  | -1.176   | Q,E       |
| HLA-A | 255 | NA      | NA | NA       | Q         |
| HLA-A | 268 | NA      | NA | NA       | K         |
| HLA-A | 276 | 13.645  | 2  | -2.963   | P,L,x     |
| HLA-A | 282 | 56.807  | 2  | -12.336  | I,V,x     |
| HLA-A | 283 | 57.739  | 2  | -12.538  | P,H,x     |
| HLA-A | 288 | 7.687   | 1  | -2.255   | I,x       |
| HLA-A | 294 | 11.371  | 2  | -2.469   | F,L,x     |
| HLA-A | 297 | 59.923  | 2  | -13.012  | V,M,x     |
| HLA-A | 298 | 84.212  | 2  | -18.286  | I,F,x     |
| HLA-A | 299 | 137.618 | 2  | -29.883  | T,A,x     |
| HLA-A | 307 | 84.212  | 2  | -18.286  | M,R,x     |
| HLA-A | 310 | 7.687   | 1  | -2.255   | R,x       |
| HLA-A | 311 | 56.807  | 2  | -12.336  | K,N,x     |
| HLA-A | 314 | 7.687   | 1  | -2.255   | D,x       |
| HLA-A | 321 | 13.645  | 2  | -2.963   | S,T,x     |
| HLA-A | 334 | 137.618 | 2  | -29.883  | V,M,x     |
| HLA-B | -23 | 57.366  | 1  | -13.442  | L,R       |
| HLA-B | -21 | 57.366  | 1  | -13.442  | M,T       |
| HLA-B | -16 | 111.776 | 1  | -25.398  | V,L       |
| HLA-B | -11 | 515.372 | 1  | -113.367 | S,W       |
| HLA-B | -10 | 139.990 | 1  | -31.572  | A,G       |

|       |     |         |    |          |             |
|-------|-----|---------|----|----------|-------------|
| HLA-B | -8  | 463.904 | 1  | -102.168 | L,V         |
| HLA-B | 4   | 0.646   | 1  | -0.375   | S,F         |
| HLA-B | 9   | 837.074 | 2  | -181.768 | D,Y,H       |
| HLA-B | 11  | 60.289  | 1  | -14.087  | A,S         |
| HLA-B | 12  | 105.243 | 1  | -23.966  | M,V         |
| HLA-B | 24  | 156.174 | 2  | -33.913  | S,T,A       |
| HLA-B | 30  | 177.265 | 1  | -39.717  | D,G         |
| HLA-B | 32  | 70.759  | 1  | -16.394  | Q,L         |
| HLA-B | 41  | 69.739  | 1  | -16.169  | A,T         |
| HLA-B | 45  | 91.320  | 3  | -18.943  | E,K,M,T     |
| HLA-B | 46  | 32.592  | 1  | -7.944   | E,A         |
| HLA-B | 52  | NA      | NA | NA       | I           |
| HLA-B | 59  | 0.986   | 1  | -0.494   | Y,H         |
| HLA-B | 62  | 308.900 | 1  | -68.421  | R,G         |
| HLA-B | 63  | 36.432  | 1  | -8.801   | N,E         |
| HLA-B | 65  | 291.294 | 1  | -64.585  | Q,R         |
| HLA-B | 66  | 291.294 | 1  | -64.585  | I,N         |
| HLA-B | 67  | 808.622 | 4  | -172.982 | F,Y,S,C,M   |
| HLA-B | 69  | 656.023 | 1  | -143.961 | T,A         |
| HLA-B | 70  | 774.055 | 3  | -166.737 | N,Q,S,K     |
| HLA-B | 71  | 656.023 | 1  | -143.961 | T,A         |
| HLA-B | 74  | 29.030  | 1  | -7.147   | D,Y         |
| HLA-B | 76  | NA      | NA | NA       | E           |
| HLA-B | 77  | 557.867 | 2  | -121.139 | S,N,D       |
| HLA-B | 80  | 550.155 | 2  | -119.465 | N,T,I       |
| HLA-B | 81  | 496.960 | 1  | -109.361 | L,A         |
| HLA-B | 82  | 541.380 | 1  | -119.025 | R,L         |
| HLA-B | 83  | 541.380 | 1  | -119.025 | G,R         |
| HLA-B | 90  | NA      | NA | NA       | A           |
| HLA-B | 94  | 605.998 | 1  | -133.081 | T,I         |
| HLA-B | 95  | 679.536 | 2  | -147.559 | L,I,W       |
| HLA-B | 97  | 519.869 | 5  | -109.387 | S,R,T,W,V,N |
| HLA-B | 99  | 47.202  | 2  | -10.250  | Y,S,F       |
| HLA-B | 103 | 74.346  | 1  | -17.183  | V,L         |
| HLA-B | 109 | 24.928  | 1  | -6.225   | L,F         |
| HLA-B | 113 | 298.490 | 1  | -66.153  | H,Y         |
| HLA-B | 114 | 287.098 | 2  | -62.343  | N,D,H       |
| HLA-B | 116 | 263.221 | 4  | -55.035  | Y,D,F,L,S   |
| HLA-B | 131 | 90.287  | 1  | -20.686  | R,S         |
| HLA-B | 143 | 54.079  | 1  | -12.715  | T,S         |
| HLA-B | 145 | 12.880  | 1  | -3.479   | R,L         |
| HLA-B | 147 | 54.079  | 1  | -12.715  | W,L         |
| HLA-B | 152 | 58.665  | 1  | -13.728  | V,E         |

|       |     |         |    |          |         |
|-------|-----|---------|----|----------|---------|
| HLA-B | 156 | 841.916 | 3  | -181.455 | D,R,L,W |
| HLA-B | 158 | 107.975 | 1  | -24.565  | A,T     |
| HLA-B | 162 | NA      | NA | NA       | G       |
| HLA-B | 163 | 576.050 | 2  | -125.088 | T,E,L   |
| HLA-B | 166 | NA      | NA | NA       | E       |
| HLA-B | 167 | 230.458 | 1  | -51.325  | W,S     |
| HLA-B | 171 | 0.023   | 1  | -0.055   | Y,H     |
| HLA-B | 177 | 113.348 | 1  | -25.742  | D,E     |
| HLA-B | 178 | 126.088 | 1  | -28.532  | T,K     |
| HLA-B | 180 | 113.348 | 1  | -25.742  | E,Q     |
| HLA-B | 194 | 133.368 | 1  | -30.124  | I,V     |
| HLA-B | 199 | 217.041 | 1  | -48.398  | A,V     |
| HLA-B | 211 | NA      | NA | NA       | A       |
| HLA-B | 239 | NA      | NA | NA       | R       |
| HLA-B | 245 | NA      | NA | NA       | A       |
| HLA-B | 253 | NA      | NA | NA       | E       |
| HLA-B | 267 | NA      | NA | NA       | P       |
| HLA-B | 268 | NA      | NA | NA       | K       |
| HLA-B | 270 | NA      | NA | NA       | L       |
| HLA-B | 275 | NA      | NA | NA       | E       |
| HLA-B | 282 | 82.794  | 1  | -19.041  | V,I     |
| HLA-B | 295 | NA      | NA | NA       | A       |
| HLA-B | 296 | NA      | NA | NA       | V       |
| HLA-B | 298 | NA      | NA | NA       | V       |
| HLA-B | 299 | NA      | NA | NA       | I       |
| HLA-B | 300 | NA      | NA | NA       | G       |
| HLA-B | 305 | 77.196  | 1  | -17.810  | A,T     |
| HLA-B | 307 | 5.552   | 1  | -1.734   | M,V     |
| HLA-B | 325 | 75.950  | 2  | -16.492  | C,S,x   |
| HLA-C | -18 | 6.897   | 1  | -2.064   | R,Q     |
| HLA-C | -17 | 115.733 | 1  | -26.265  | A,T     |
| HLA-C | -15 | 83.049  | 1  | -19.097  | L,I     |
| HLA-C | -9  | 125.225 | 1  | -28.343  | G,A     |
| HLA-C | -5  | 6.897   | 1  | -2.064   | T,I     |
| HLA-C | 1   | 50.491  | 1  | -11.922  | C,G     |
| HLA-C | 6   | 37.710  | 1  | -9.086   | R,K     |
| HLA-C | 9   | 237.062 | 3  | -50.386  | D,S,Y,F |
| HLA-C | 11  | 233.821 | 1  | -52.058  | A,S     |
| HLA-C | 14  | 172.993 | 1  | -38.784  | R,W     |
| HLA-C | 16  | 20.079  | 1  | -5.129   | G,S     |
| HLA-C | 21  | 201.297 | 1  | -44.963  | R,H     |
| HLA-C | 24  | 4.388   | 1  | -1.441   | S,A     |
| HLA-C | 35  | 0.426   | 1  | -0.289   | R,Q     |

|       |     |         |   |          |           |
|-------|-----|---------|---|----------|-----------|
| HLA-C | 49  | 172.993 | 1 | -38.784  | A,E       |
| HLA-C | 66  | 514.863 | 1 | -113.256 | N,K       |
| HLA-C | 73  | 20.175  | 1 | -5.151   | A,T       |
| HLA-C | 77  | 166.464 | 1 | -37.359  | S,N       |
| HLA-C | 80  | 166.464 | 1 | -37.359  | N,K       |
| HLA-C | 90  | 6.868   | 1 | -2.057   | D,A       |
| HLA-C | 91  | 7.407   | 1 | -2.187   | G,R       |
| HLA-C | 94  | 299.686 | 1 | -66.414  | T,I       |
| HLA-C | 95  | 292.447 | 2 | -63.504  | L,I,F     |
| HLA-C | 97  | 358.951 | 1 | -79.322  | R,W       |
| HLA-C | 99  | 412.190 | 3 | -88.295  | Y,S,F,C   |
| HLA-C | 103 | 309.656 | 1 | -68.586  | L,V       |
| HLA-C | 113 | 1.141   | 1 | -0.544   | Y,H       |
| HLA-C | 114 | 83.387  | 1 | -19.171  | D,N       |
| HLA-C | 116 | 237.434 | 3 | -50.467  | S,F,Y,L   |
| HLA-C | 138 | 0.456   | 1 | -0.301   | T,K       |
| HLA-C | 143 | 6.897   | 1 | -2.064   | T,S       |
| HLA-C | 147 | 115.872 | 1 | -26.295  | L,W       |
| HLA-C | 152 | 45.237  | 1 | -10.758  | A,E       |
| HLA-C | 156 | 684.429 | 4 | -146.086 | L,R,W,D,Q |
| HLA-C | 163 | 321.856 | 2 | -69.890  | T,L,E     |
| HLA-C | 170 | 6.897   | 1 | -2.064   | R,G       |
| HLA-C | 173 | 309.656 | 1 | -68.586  | E,K       |
| HLA-C | 177 | 2.743   | 1 | -1.010   | E,K       |
| HLA-C | 184 | 129.050 | 2 | -28.023  | P,H,R     |
| HLA-C | 193 | 141.891 | 1 | -31.988  | P,L       |
| HLA-C | 194 | 125.124 | 1 | -28.320  | L,V       |
| HLA-C | 211 | 20.079  | 1 | -5.129   | A,T       |
| HLA-C | 219 | 17.797  | 1 | -4.610   | R,W       |
| HLA-C | 248 | 37.710  | 1 | -9.086   | V,M       |
| HLA-C | 253 | 115.872 | 1 | -26.295  | Q,E       |
| HLA-C | 261 | 125.124 | 1 | -28.320  | M,V       |
| HLA-C | 267 | 115.872 | 1 | -26.295  | Q,P       |
| HLA-C | 270 | 6.897   | 1 | -2.064   | L,C       |
| HLA-C | 273 | 125.124 | 1 | -28.320  | S,R       |
| HLA-C | 275 | 185.938 | 2 | -40.376  | E,K,G     |
| HLA-C | 284 | 6.897   | 1 | -2.064   | I,N       |
| HLA-C | 285 | 129.333 | 2 | -28.084  | M,V,L     |
| HLA-C | 289 | 6.897   | 1 | -2.064   | A,S       |
| HLA-C | 291 | 6.897   | 1 | -2.064   | L,P       |
| HLA-C | 295 | 125.269 | 1 | -28.352  | V,A       |
| HLA-C | 303 | 172.993 | 1 | -38.784  | V,M       |
| HLA-C | 304 | 86.706  | 1 | -19.900  | V,M       |

|          |     |         |    |         |       |
|----------|-----|---------|----|---------|-------|
| HLA-C    | 305 | 125.269 | 1  | -28.352 | T,A   |
| HLA-C    | 306 | 116.010 | 1  | -26.325 | A,V   |
| HLA-C    | 307 | 125.127 | 1  | -28.321 | M,V   |
| HLA-C    | 308 | 6.897   | 1  | -2.064  | M,I   |
| HLA-C    | 309 | 6.897   | 1  | -2.064  | C,H   |
| HLA-C    | 326 | 125.349 | 1  | -28.370 | C,S   |
| HLA-C    | 339 | 125.349 | 1  | -28.370 | T,A   |
| HLA-DPA1 | 11  | 80.202  | 1  | -18.471 | A,M   |
| HLA-DPA1 | 18  | NA      | NA | NA      | P     |
| HLA-DPA1 | 28  | 15.792  | 1  | -4.151  | E,D   |
| HLA-DPA1 | 31  | 17.311  | 1  | -4.499  | M,Q   |
| HLA-DPA1 | 50  | 17.311  | 1  | -4.499  | Q,R   |
| HLA-DPA1 | 66  | NA      | NA | NA      | L     |
| HLA-DPA1 | 72  | NA      | NA | NA      | T     |
| HLA-DPA1 | 73  | NA      | NA | NA      | L     |
| HLA-DPA1 | 83  | 18.612  | 1  | -4.795  | T,A   |
| HLA-DPA1 | 96  | 3.086   | 1  | -1.103  | P,x   |
| HLA-DPA1 | 111 | 20.595  | 2  | -4.472  | K,R,x |
| HLA-DPA1 | 127 | 20.595  | 2  | -4.472  | L,P,x |
| HLA-DPA1 | 160 | 20.595  | 2  | -4.472  | F,V,x |
| HLA-DPA1 | 190 | 3.086   | 1  | -1.103  | T,x   |
| HLA-DPA1 | 228 | 20.595  | 2  | -4.472  | T,P,x |
| HLA-DPB1 | 8   | 111.998 | 1  | -25.447 | L,V   |
| HLA-DPB1 | 9   | 188.607 | 2  | -40.955 | F,Y,H |
| HLA-DPB1 | 11  | 36.877  | 1  | -8.900  | G,L   |
| HLA-DPB1 | 33  | 7.044   | 1  | -2.099  | E,Q   |
| HLA-DPB1 | 35  | 31.807  | 2  | -6.907  | F,Y,L |
| HLA-DPB1 | 36  | 0.895   | 1  | -0.463  | A,V   |
| HLA-DPB1 | 55  | 10.642  | 2  | -2.311  | A,D,E |
| HLA-DPB1 | 56  | 0.081   | 1  | -0.110  | A,E   |
| HLA-DPB1 | 57  | 124.901 | 1  | -28.272 | E,D   |
| HLA-DPB1 | 65  | 112.802 | 1  | -25.623 | I,L   |
| HLA-DPB1 | 69  | 31.303  | 2  | -6.797  | K,E,R |
| HLA-DPB1 | 72  | NA      | NA | NA      | V     |
| HLA-DPB1 | 76  | 150.887 | 2  | -32.765 | M,V,I |
| HLA-DPB1 | 84  | 87.175  | 2  | -18.930 | G,D,V |
| HLA-DPB1 | 85  | 55.790  | 1  | -13.094 | G,E   |
| HLA-DPB1 | 86  | 55.790  | 1  | -13.094 | P,A   |
| HLA-DPB1 | 87  | 55.790  | 1  | -13.094 | M,V   |
| HLA-DPB1 | 91  | NA      | NA | NA      | R     |
| HLA-DPB1 | 96  | 82.300  | 1  | -18.932 | R,K   |
| HLA-DPB1 | 170 | 82.300  | 1  | -18.932 | T,I   |
| HLA-DPB1 | 178 | 319.319 | 1  | -70.691 | L,M   |

|          |     |          |   |          |         |
|----------|-----|----------|---|----------|---------|
| HLA-DPB1 | 194 | 57.774   | 2 | -12.545  | R,Q,x   |
| HLA-DPB1 | 205 | 69.012   | 2 | -14.986  | V,x,M   |
| HLA-DPB1 | 215 | 34.560   | 2 | -7.505   | I,x,T   |
| HLA-DQA1 | -16 | 2323.579 | 1 | -506.340 | M,L     |
| HLA-DQA1 | 11  | 2467.039 | 1 | -537.505 | Y,C     |
| HLA-DQA1 | 18  | 2467.039 | 1 | -537.505 | S,F     |
| HLA-DQA1 | 25  | 1604.701 | 1 | -350.157 | Y,F     |
| HLA-DQA1 | 26  | 2035.607 | 1 | -443.779 | T,S     |
| HLA-DQA1 | 34  | 194.752  | 1 | -43.535  | Q,E     |
| HLA-DQA1 | 40  | 472.137  | 1 | -103.959 | G,E     |
| HLA-DQA1 | 41  | 493.293  | 1 | -108.563 | R,K     |
| HLA-DQA1 | 45  | 2467.039 | 1 | -537.505 | V,A     |
| HLA-DQA1 | 47  | 4453.846 | 3 | -965.414 | C,R,Q,K |
| HLA-DQA1 | 48  | 2467.039 | 1 | -537.505 | L,W     |
| HLA-DQA1 | 50  | 2469.126 | 2 | -536.164 | V,E,L   |
| HLA-DQA1 | 51  | 472.137  | 1 | -103.959 | L,F     |
| HLA-DQA1 | 52  | 4252.376 | 2 | -923.392 | R,S,H   |
| HLA-DQA1 | 53  | 2469.126 | 2 | -536.164 | Q,K,R   |
| HLA-DQA1 | 54  | 1002.782 | 1 | -219.350 | F,L     |
| HLA-DQA1 | 55  | 2467.039 | 1 | -537.505 | R,G     |
| HLA-DQA1 | 56  | 3221.756 | 2 | -699.595 | x,G,R   |
| HLA-DQA1 | 61  | 2467.039 | 1 | -537.505 | F,G     |
| HLA-DQA1 | 64  | 2467.039 | 1 | -537.505 | T,R     |
| HLA-DQA1 | 66  | 2467.039 | 1 | -537.505 | I,M     |
| HLA-DQA1 | 69  | 2486.066 | 2 | -539.842 | L,A,T   |
| HLA-DQA1 | 75  | 488.565  | 1 | -107.534 | S,I     |
| HLA-DQA1 | 76  | 3221.756 | 2 | -699.595 | L,M,V   |
| HLA-DQA1 | 80  | 2467.039 | 1 | -537.505 | S,Y     |
| HLA-DQA1 | 107 | 488.565  | 1 | -107.534 | I,T     |
| HLA-DQA1 | 129 | 1813.514 | 1 | -395.527 | H,Q     |
| HLA-DQA1 | 130 | 493.293  | 1 | -108.563 | S,A     |
| HLA-DQA1 | 156 | 488.565  | 1 | -107.534 | L,F     |
| HLA-DQA1 | 161 | 488.565  | 1 | -107.534 | E,D     |
| HLA-DQA1 | 163 | 488.565  | 1 | -107.534 | S,I     |
| HLA-DQA1 | 175 | 2476.214 | 2 | -537.703 | K,Q,E   |
| HLA-DQA1 | 187 | 2035.607 | 1 | -443.779 | A,T     |
| HLA-DQA1 | 207 | 1798.442 | 1 | -392.252 | V,M     |
| HLA-DQA1 | 215 | 564.872  | 1 | -124.135 | F,L     |
| HLA-DQA1 | 218 | 2467.039 | 1 | -537.505 | R,Q     |
| HLA-DQB1 | -27 | 218.161  | 2 | -47.373  | A,S,x   |
| HLA-DQB1 | -21 | 2601.661 | 2 | -564.943 | G,D,x   |
| HLA-DQB1 | -18 | 0.843    | 2 | -0.183   | A,V,x   |
| HLA-DQB1 | -17 | 49.780   | 2 | -10.810  | A,x,P   |

|          |     |          |    |           |         |
|----------|-----|----------|----|-----------|---------|
| HLA-DQB1 | -10 | 678.904  | 2  | -147.422  | S,A,x   |
| HLA-DQB1 | -9  | 218.161  | 2  | -47.373   | M,I,x   |
| HLA-DQB1 | -6  | 2601.661 | 2  | -564.943  | T,S,x   |
| HLA-DQB1 | -5  | 3628.641 | 3  | -786.267  | P,L,S,x |
| HLA-DQB1 | -4  | 2601.661 | 2  | -564.943  | V,L,x   |
| HLA-DQB1 | 3   | 49.577   | 1  | -11.720   | S,P     |
| HLA-DQB1 | 9   | 1820.906 | 2  | -395.405  | Y,F,L   |
| HLA-DQB1 | 13  | 1204.367 | 1  | -263.164  | G,A     |
| HLA-DQB1 | 14  | 216.276  | 1  | -48.231   | M,L     |
| HLA-DQB1 | 23  | NA       | NA | NA        | R       |
| HLA-DQB1 | 26  | 1567.122 | 2  | -340.296  | L,Y,G   |
| HLA-DQB1 | 28  | 670.975  | 1  | -147.212  | S,T     |
| HLA-DQB1 | 30  | 894.423  | 2  | -194.222  | S,Y,H   |
| HLA-DQB1 | 37  | 709.166  | 2  | -153.993  | I,Y,D   |
| HLA-DQB1 | 38  | 184.131  | 1  | -41.216   | V,A     |
| HLA-DQB1 | 45  | 1151.937 | 1  | -251.769  | G,E     |
| HLA-DQB1 | 46  | 670.975  | 1  | -147.212  | E,V     |
| HLA-DQB1 | 47  | 670.975  | 1  | -147.212  | F,Y     |
| HLA-DQB1 | 52  | 671.616  | 1  | -147.352  | L,P     |
| HLA-DQB1 | 53  | 2464.611 | 1  | -536.978  | L,Q     |
| HLA-DQB1 | 55  | 2334.797 | 2  | -506.995  | L,R,P   |
| HLA-DQB1 | 56  | 1.151    | 1  | -0.548    | P,L     |
| HLA-DQB1 | 57  | 6249.235 | 3  | -1355.204 | A,D,V,S |
| HLA-DQB1 | 66  | 624.002  | 1  | -136.997  | D,E     |
| HLA-DQB1 | 67  | 624.002  | 1  | -136.997  | I,V     |
| HLA-DQB1 | 70  | 2453.104 | 2  | -532.685  | R,G,E   |
| HLA-DQB1 | 71  | 750.696  | 3  | -161.671  | K,T,A,D |
| HLA-DQB1 | 74  | 710.298  | 2  | -154.239  | A,E,S   |
| HLA-DQB1 | 75  | 211.132  | 1  | -47.109   | V,L     |
| HLA-DQB1 | 77  | 204.355  | 1  | -45.630   | R,T     |
| HLA-DQB1 | 84  | 2464.611 | 1  | -536.978  | Q,E     |
| HLA-DQB1 | 85  | 2464.611 | 1  | -536.978  | L,V     |
| HLA-DQB1 | 86  | 2610.413 | 2  | -566.844  | E,A,G   |
| HLA-DQB1 | 87  | 3645.367 | 2  | -791.581  | L,F,Y   |
| HLA-DQB1 | 89  | 2464.611 | 1  | -536.978  | T,G     |
| HLA-DQB1 | 90  | 2464.611 | 1  | -536.978  | T,I     |
| HLA-DQB1 | 116 | 216.276  | 1  | -48.231   | V,I     |
| HLA-DQB1 | 125 | 3012.659 | 2  | -654.191  | A,G,S   |
| HLA-DQB1 | 126 | 3.161    | 1  | -1.123    | Q,H     |
| HLA-DQB1 | 130 | 23.104   | 1  | -5.814    | R,Q     |
| HLA-DQB1 | 135 | 472.551  | 1  | -104.049  | D,G     |
| HLA-DQB1 | 140 | 393.983  | 1  | -86.949   | A,T     |
| HLA-DQB1 | 167 | 1205.946 | 1  | -263.507  | R,H     |



|          |     |          |   |           |             |
|----------|-----|----------|---|-----------|-------------|
| HLA-DQB1 | 182 | 393.771  | 1 | -86.903   | S,N         |
| HLA-DQB1 | 185 | 2158.008 | 1 | -470.371  | T,I         |
| HLA-DQB1 | 197 | 49.577   | 1 | -11.720   | S,N         |
| HLA-DQB1 | 203 | 2407.217 | 2 | -522.721  | I,V,x       |
| HLA-DQB1 | 220 | 2470.906 | 2 | -536.550  | H,R,x       |
| HLA-DQB1 | 221 | 2470.906 | 2 | -536.550  | H,Q,x       |
| HLA-DQB1 | 224 | 223.680  | 2 | -48.571   | Q,R,x       |
| HLA-DRB1 | -25 | 80.191   | 2 | -17.413   | R,K,x       |
| HLA-DRB1 | -24 | 2057.637 | 2 | -446.810  | L,F,x       |
| HLA-DRB1 | -17 | 1573.095 | 2 | -341.593  | A,T,x       |
| HLA-DRB1 | -16 | 80.191   | 2 | -17.413   | V,A,x       |
| HLA-DRB1 | -1  | 2730.308 | 2 | -592.879  | A,S,x       |
| HLA-DRB1 | 4   | 855.614  | 1 | -187.359  | R,Q         |
| HLA-DRB1 | 9   | 2965.803 | 2 | -644.016  | E,W,K       |
| HLA-DRB1 | 10  | 113.318  | 2 | -24.607   | Y,Q,E       |
| HLA-DRB1 | 11  | 4598.456 | 5 | -993.623  | S,P,V,L,G,D |
| HLA-DRB1 | 12  | 62.793   | 1 | -14.639   | T,K         |
| HLA-DRB1 | 13  | 4732.895 | 5 | -1022.797 | S,R,H,F,G,Y |
| HLA-DRB1 | 14  | 1002.102 | 1 | -219.203  | E,K         |
| HLA-DRB1 | 16  | 26.813   | 1 | -6.650    | H,Y         |
| HLA-DRB1 | 25  | 1002.102 | 1 | -219.203  | R,Q         |
| HLA-DRB1 | 26  | 1669.514 | 2 | -362.530  | Y,F,L       |
| HLA-DRB1 | 28  | 1025.631 | 2 | -222.713  | D,E,H       |
| HLA-DRB1 | 30  | 1340.255 | 5 | -286.916  | Y,C,L,R,G,H |
| HLA-DRB1 | 31  | 113.035  | 2 | -24.545   | F,I,V       |
| HLA-DRB1 | 32  | 401.529  | 1 | -88.592   | H,Y         |
| HLA-DRB1 | 33  | 2055.925 | 1 | -448.193  | N,H         |
| HLA-DRB1 | 37  | 3636.529 | 4 | -786.402  | N,S,Y,F,L   |
| HLA-DRB1 | 38  | 152.698  | 2 | -33.158   | V,A,L       |
| HLA-DRB1 | 40  | 55.843   | 1 | -13.105   | F,Y         |
| HLA-DRB1 | 47  | 135.982  | 1 | -30.696   | F,Y         |
| HLA-DRB1 | 57  | 1443.401 | 3 | -311.949  | D,S,V,A     |
| HLA-DRB1 | 58  | 762.817  | 1 | -167.183  | A,E         |
| HLA-DRB1 | 60  | 1436.473 | 2 | -311.926  | Y,S,H       |
| HLA-DRB1 | 67  | 4948.109 | 2 | -1074.468 | L,I,F       |
| HLA-DRB1 | 70  | 2524.408 | 2 | -548.168  | Q,D,R       |
| HLA-DRB1 | 71  | 5836.723 | 3 | -1265.643 | K,A,E,R     |
| HLA-DRB1 | 73  | 303.131  | 1 | -67.164   | G,A         |
| HLA-DRB1 | 74  | 2511.514 | 4 | -542.269  | R,A,L,Q,E   |
| HLA-DRB1 | 77  | 1700.917 | 1 | -371.063  | N,T         |
| HLA-DRB1 | 78  | 855.853  | 1 | -187.411  | Y,V         |
| HLA-DRB1 | 85  | 101.480  | 1 | -23.142   | V,A         |
| HLA-DRB1 | 86  | 0.371    | 1 | -0.266    | V,G         |

|          |     |          |   |          |         |
|----------|-----|----------|---|----------|---------|
| HLA-DRB1 | 96  | 3818.584 | 3 | -827.502 | H,Q,Y,E |
| HLA-DRB1 | 98  | 554.070  | 1 | -121.785 | K,E     |
| HLA-DRB1 | 104 | 554.070  | 1 | -121.785 | S,A     |
| HLA-DRB1 | 112 | 414.389  | 1 | -91.391  | H,Y     |
| HLA-DRB1 | 120 | 1949.075 | 1 | -424.979 | S,N     |
| HLA-DRB1 | 133 | 2389.548 | 1 | -520.671 | R,L     |
| HLA-DRB1 | 140 | 2837.924 | 1 | -618.072 | T,A     |
| HLA-DRB1 | 142 | 2389.548 | 1 | -520.671 | V,M     |
| HLA-DRB1 | 149 | 63.877   | 1 | -14.878  | H,Q     |
| HLA-DRB1 | 166 | 55.843   | 1 | -13.105  | R,Q     |
| HLA-DRB1 | 180 | 2091.410 | 2 | -454.144 | V,L,x   |
| HLA-DRB1 | 181 | 914.644  | 2 | -198.612 | T,x,M   |
| HLA-DRB1 | 189 | 47.198   | 2 | -10.249  | R,x,S   |
| HLA-DRB1 | 231 | 66.198   | 2 | -14.375  | Q,x,P   |
| HLA-DRB1 | 233 | 95.363   | 2 | -20.708  | R,T,x   |

Supplementary Table 4A. Independent amino acid associations in HLA-DRB1-DQA1-DQB1

| Gene     | mino acid positio | Residue | Case frequen | control frequen | Unadjusted      |              |              |           | Adjusted        |              |              |          | Adjusted for    |         |  |
|----------|-------------------|---------|--------------|-----------------|-----------------|--------------|--------------|-----------|-----------------|--------------|--------------|----------|-----------------|---------|--|
|          |                   |         |              |                 | OR (univariate) | 95% CI lower | 95% CI upper | log10(p)  | OR (univariate) | 95% CI lower | 95% CI upper | log10(p) |                 |         |  |
| HLA-DQB1 | #57               |         |              |                 |                 |              |              |           |                 |              |              |          |                 |         |  |
|          |                   | Asp     | 0.123        | 0.472           | 0.159           | 0.150        | 0.169        | -1355.200 |                 |              |              |          |                 |         |  |
|          |                   | Ala     | 0.747        | 0.359           | 5.171           | 4.906        | 5.452        | -1062.406 |                 |              |              |          |                 |         |  |
|          |                   | Val     | 0.123        | 0.160           | 0.723           | 0.680        | 0.769        | -24.482   |                 |              |              |          |                 |         |  |
|          |                   | Ser     | 0.007        | 0.009           | 0.802           | 0.633        | 1.015        | -1.193    |                 |              |              |          |                 |         |  |
| HLA-DRB1 | #13               |         |              |                 |                 |              |              |           |                 |              |              |          |                 |         |  |
|          |                   | Ser     | 0.389        | 0.336           | 1.277           | 1.220        | 1.336        | -25.438   | 0.916           | 0.866        | 0.969        | -721.900 | DQB1#57         | -2.681  |  |
|          |                   | His     | 0.415        | 0.195           | 3.644           | 3.447        | 3.852        | -519.296  | 2.992           | 2.803        | 3.193        | -251.699 |                 |         |  |
|          |                   | Arg     | 0.013        | 0.149           | 0.078           | 0.067        | 0.090        | -508.267  | 0.120           | 0.097        | 0.149        | -139.386 |                 |         |  |
|          |                   | Tyr     | 0.045        | 0.144           | 0.281           | 0.258        | 0.306        | -219.236  | 0.155           | 0.140        | 0.172        | -353.000 |                 |         |  |
|          |                   | Phe     | 0.107        | 0.136           | 0.747           | 0.700        | 0.798        | -17.647   | 1.654           | 1.469        | 1.862        | -16.116  |                 |         |  |
|          |                   | Gly     | 0.030        | 0.040           | 0.716           | 0.636        | 0.805        | -7.751    | 3.094           | 2.694        | 3.553        | -54.478  |                 |         |  |
| HLA-DRB1 | #71               |         |              |                 |                 |              |              |           |                 |              |              |          |                 |         |  |
|          |                   | Arg     | 0.305        | 0.465           | 0.486           | 0.464        | 0.509        | -1265.643 | 0.475           | 0.436        | 0.517        | -95.900  | DQB1#57,DRB1#13 | -67.344 |  |
|          |                   | Lys     | 0.620        | 0.273           | 4.704           | 4.463        | 4.958        | -218.785  | 2.027           | 1.868        | 2.199        | -64.651  |                 |         |  |
|          |                   | Ala     | 0.006        | 0.141           | 0.038           | 0.031        | 0.047        | -574.311  | 0.436           | 0.143        | 1.329        | -0.873   |                 |         |  |
|          |                   | Glu     | 0.069        | 0.120           | 0.530           | 0.491        | 0.573        | -61.221   | 1.006           | 0.894        | 1.133        | -0.037   |                 |         |  |



|          |     |             |          |   |           |          |    |          |         |    |         |         |    |         |
|----------|-----|-------------|----------|---|-----------|----------|----|----------|---------|----|---------|---------|----|---------|
| HLA-DQB1 | 203 | I,V,x       | 2407.217 | 2 | -522.721  | 657.188  | 3  | -141.395 | 24.867  | 8  | -2.786  | 55.494  | 10 | -7.593  |
| HLA-DQB1 | 220 | H,R,x       | 2470.906 | 2 | -536.550  | 661.426  | 3  | -142.314 | 6.889   | 8  | -0.261  | 37.480  | 10 | -4.330  |
| HLA-DQB1 | 221 | H,Q,x       | 2470.906 | 2 | -536.550  | 661.426  | 3  | -142.314 | 6.889   | 8  | -0.261  | 37.480  | 10 | -4.330  |
| HLA-DQB1 | 224 | Q,R,x       | 223.680  | 2 | -48.571   | 88.310   | 3  | -18.297  | 64.876  | 8  | -10.292 | 40.342  | 10 | -4.831  |
| HLA-DRB1 | -25 | R,K,x       | 80.191   | 2 | -17.413   | 352.258  | 7  | -71.393  | 140.229 | 7  | -26.342 | 146.222 | 11 | -25.055 |
| HLA-DRB1 | -24 | L,F,x       | 2057.637 | 2 | -446.810  | 1427.950 | 6  | -304.668 | 101.895 | 5  | -19.676 | 105.831 | 8  | -18.564 |
| HLA-DRB1 | -17 | A,T,x       | 1573.095 | 2 | -341.593  | 849.680  | 7  | -178.454 | 176.767 | 6  | -34.783 | 141.049 | 9  | -25.203 |
| HLA-DRB1 | -16 | V,A,x       | 80.191   | 2 | -17.413   | 352.258  | 7  | -71.393  | 140.229 | 7  | -26.342 | 146.222 | 11 | -25.055 |
| HLA-DRB1 | -1  | A,S,x       | 2730.308 | 2 | -592.879  | 854.490  | 7  | -179.492 | 97.025  | 4  | -19.374 | 100.370 | 6  | -18.678 |
| HLA-DRB1 | 4   | R,Q         | 855.614  | 1 | -187.359  | 1851.267 | 2  | -401.998 | 43.580  | 4  | -8.106  | 1.898   | 4  | -0.122  |
| HLA-DRB1 | 9   | E,W,K       | 2965.803 | 2 | -644.016  | 2862.273 | 6  | -615.524 | 80.877  | 5  | -15.260 | 41.516  | 5  | -7.132  |
| HLA-DRB1 | 10  | Y,Q,E       | 113.318  | 2 | -24.607   | 84.544   | 5  | -16.028  | 42.231  | 3  | -8.446  | 45.092  | 3  | -9.053  |
| HLA-DRB1 | 11  | S,P,V,L,G,D | 4598.456 | 5 | -993.623  | 3155.592 | 15 | -667.711 | 84.746  | 5  | -16.070 | 46.192  | 5  | -8.081  |
| HLA-DRB1 | 12  | T,K         | 62.793   | 1 | -14.639   | 47.328   | 4  | -8.885   | 0.000   | 0  | 0.000   | 0.000   | 0  | 0.000   |
| HLA-DRB1 | 13  | S,R,H,F,G,Y | 4732.895 | 5 | -1022.797 | 3411.777 | 16 | -721.935 | NA      | NA | NA      | NA      | NA | NA      |
| HLA-DRB1 | 14  | E,K         | 1002.102 | 1 | -219.203  | 1970.177 | 2  | -427.818 | 0.000   | 0  | 0.000   | 0.000   | 0  | 0.000   |
| HLA-DRB1 | 16  | H,Y         | 26.813   | 1 | -6.650    | 322.145  | 3  | -68.796  | 0.000   | 0  | 0.000   | 0.000   | 0  | 0.000   |
| HLA-DRB1 | 25  | R,Q         | 1002.102 | 1 | -219.203  | 1970.177 | 2  | -427.818 | 0.000   | 0  | 0.000   | 0.000   | 0  | 0.000   |
| HLA-DRB1 | 26  | Y,F,L       | 1669.514 | 2 | -362.530  | 256.313  | 7  | -50.901  | 118.916 | 6  | -22.560 | 69.425  | 6  | -12.270 |
| HLA-DRB1 | 28  | D,E,H       | 1025.631 | 2 | -222.713  | 2115.907 | 6  | -453.715 | 109.913 | 3  | -22.941 | 68.610  | 3  | -14.072 |
| HLA-DRB1 | 30  | Y,C,L,R,G,H | 1340.255 | 5 | -286.916  | 2228.429 | 10 | -473.088 | 147.194 | 4  | -30.090 | 108.212 | 4  | -21.757 |
| HLA-DRB1 | 31  | F,I,V       | 113.035  | 2 | -24.545   | 225.070  | 5  | -45.914  | 37.303  | 1  | -8.995  | 39.616  | 1  | -9.510  |
| HLA-DRB1 | 32  | H,Y         | 401.529  | 1 | -88.592   | 50.121   | 4  | -9.468   | 105.732 | 5  | -20.486 | 141.195 | 9  | -25.233 |
| HLA-DRB1 | 33  | N,H         | 2055.925 | 1 | -448.193  | 965.814  | 3  | -208.329 | 0.000   | 0  | 0.000   | 0.000   | 0  | 0.000   |
| HLA-DRB1 | 37  | N,S,Y,F,L   | 3636.529 | 4 | -786.402  | 3074.812 | 12 | -653.831 | 213.762 | 11 | -38.988 | 145.130 | 12 | -24.260 |
| HLA-DRB1 | 38  | V,A,L       | 152.698  | 2 | -33.158   | 41.382   | 2  | -8.986   | 104.686 | 2  | -22.732 | 107.122 | 2  | -23.261 |
| HLA-DRB1 | 40  | F,Y         | 55.843   | 1 | -13.105   | 36.724   | 1  | -8.866   | 37.303  | 1  | -8.995  | 39.616  | 1  | -9.510  |
| HLA-DRB1 | 47  | F,Y         | 135.982  | 1 | -30.696   | 592.090  | 4  | -126.098 | 116.243 | 7  | -21.334 | 100.351 | 7  | -18.040 |
| HLA-DRB1 | 57  | D,S,V,A     | 1443.401 | 3 | -311.949  | 2257.855 | 9  | -480.667 | 186.736 | 12 | -32.754 | 202.151 | 12 | -35.931 |
| HLA-DRB1 | 58  | A,E         | 762.817  | 1 | -167.183  | 38.847   | 3  | -7.728   | 0.323   | 3  | -0.020  | 33.246  | 5  | -5.473  |
| HLA-DRB1 | 60  | Y,S,H       | 1436.473 | 2 | -311.926  | 1944.029 | 6  | -416.465 | 162.384 | 7  | -30.996 | 97.773  | 6  | -18.136 |
| HLA-DRB1 | 67  | L,I,F       | 4948.109 | 2 | -1074.468 | 2283.776 | 8  | -487.520 | 216.586 | 13 | -38.278 | 130.546 | 10 | -22.442 |
| HLA-DRB1 | 70  | Q,D,R       | 2524.408 | 2 | -548.168  | 1652.477 | 8  | -350.856 | 154.839 | 14 | -25.113 | 77.102  | 10 | -11.732 |
| HLA-DRB1 | 71  | K,A,E,R     | 5836.723 | 3 | -1265.643 | 1987.409 | 10 | -420.950 | 487.513 | 12 | -95.998 | NA      | NA | NA      |
| HLA-DRB1 | 73  | G,A         | 303.131  | 1 | -67.164   | 791.727  | 3  | -170.569 | 9.275   | 3  | -1.588  | 0.774   | 2  | -0.168  |
| HLA-DRB1 | 74  | R,A,L,Q,E   | 2511.514 | 4 | -542.269  | 2519.326 | 12 | -533.641 | 301.357 | 12 | -56.613 | 121.267 | 10 | -20.553 |
| HLA-DRB1 | 77  | N,T         | 1700.917 | 1 | -371.063  | 35.630   | 3  | -7.047   | 9.275   | 3  | -1.588  | 0.774   | 2  | -0.168  |
| HLA-DRB1 | 78  | Y,V         | 855.853  | 1 | -187.411  | 1850.299 | 2  | -401.787 | 42.526  | 2  | -9.234  | 1.097   | 2  | -0.238  |
| HLA-DRB1 | 85  | V,A         | 101.480  | 1 | -23.142   | 7.844    | 2  | -1.703   | 70.807  | 2  | -15.376 | 72.061  | 2  | -15.648 |
| HLA-DRB1 | 86  | V,G         | 0.371    | 1 | -0.266    | 583.286  | 4  | -124.193 | 463.615 | 10 | -92.585 | 210.566 | 13 | -37.037 |
| HLA-DRB1 | 96  | H,Q,Y,E     | 3818.584 | 3 | -827.502  | 1515.611 | 11 | -317.869 | 80.941  | 7  | -14.053 | 49.030  | 8  | -7.202  |
| HLA-DRB1 | 98  | K,E         | 554.070  | 1 | -121.785  | 311.415  | 3  | -66.473  | 43.646  | 6  | -7.061  | 9.417   | 7  | -0.650  |
| HLA-DRB1 | 104 | S,A         | 554.070  | 1 | -121.785  | 311.415  | 3  | -66.473  | 43.646  | 6  | -7.061  | 9.417   | 7  | -0.650  |
| HLA-DRB1 | 112 | H,Y         | 414.389  | 1 | -91.391   | 92.716   | 4  | -18.458  | 52.450  | 4  | -9.954  | 29.149  | 3  | -5.681  |
| HLA-DRB1 | 120 | S,N         | 1949.075 | 1 | -424.979  | 998.089  | 3  | -215.330 | 38.590  | 5  | -6.542  | 48.205  | 7  | -7.488  |
| HLA-DRB1 | 133 | R,L         | 2389.548 | 1 | -520.671  | 689.439  | 4  | -147.171 | 0.000   | 0  | 0.000   | 0.000   | 0  | 0.000   |
| HLA-DRB1 | 140 | T,A         | 2837.924 | 1 | -618.072  | 2252.078 | 4  | -485.981 | 37.303  | 1  | -8.995  | 39.616  | 1  | -9.510  |
| HLA-DRB1 | 142 | V,M         | 2389.548 | 1 | -520.671  | 689.439  | 4  | -147.171 | 0.000   | 0  | 0.000   | 0.000   | 0  | 0.000   |
| HLA-DRB1 | 149 | H,Q         | 63.877   | 1 | -14.878   | 48.171   | 4  | -9.061   | 1.289   | 4  | -0.064  | 8.593   | 6  | -0.704  |
| HLA-DRB1 | 166 | R,Q         | 55.843   | 1 | -13.105   | 36.724   | 1  | -8.866   | 37.303  | 1  | -8.995  | 39.616  | 1  | -9.510  |
| HLA-DRB1 | 180 | V,L,x       | 2091.410 | 2 | -454.144  | 1532.350 | 5  | -328.542 | 99.957  | 5  | -19.268 | 107.402 | 7  | -19.498 |
| HLA-DRB1 | 181 | T,x,M       | 214.644  | 2 | -198.612  | 2315.214 | 5  | -498.270 | 178.454 | 4  | -36.796 | 139.500 | 4  | -28.442 |
| HLA-DRB1 | 189 | R,x,S       | 47.198   | 2 | -10.249   | 307.258  | 4  | -64.531  | 108.054 | 4  | -21.723 | 106.781 | 4  | -21.452 |
| HLA-DRB1 | 231 | Q,x,P       | 66.198   | 2 | -14.375   | 338.662  | 4  | -71.308  | 135.734 | 4  | -27.636 | 136.789 | 4  | -27.862 |
| HLA-DRB1 | 233 | R,T,x       | 95.363   | 2 | -20.708   | 347.994  | 7  | -70.480  | 109.343 | 8  | -19.284 | 115.406 | 10 | -19.365 |

Supplementary Table 4C. All classical allele associations in HLA-DRB1-DQA1-DQB1

| Classical allele | Unadjusted |          | Adj. DQb1#57 |          | Adj.DQb1#57,DRb1#13 |          | Adj.DQb1#57,DRb1#13,DRb1#71 |          |
|------------------|------------|----------|--------------|----------|---------------------|----------|-----------------------------|----------|
|                  | Deviance   | log10(p) | Deviance     | log10(p) | Deviance            | log10(p) | Deviance                    | log10(p) |
| HLA-DQA1*01      | 2465.944   | -537.267 | 657.692      | -144.324 | 0.007               | -0.029   | 28.463                      | -7.020   |
| HLA-DQA1*0101    | 211.449    | -47.178  | 13.516       | -3.626   | 56.131              | -13.169  | 31.273                      | -7.650   |
| HLA-DQA1*0102    | 1798.442   | -392.252 | 324.950      | -71.917  | 8.493               | -2.448   | 16.270                      | -4.260   |
| HLA-DQA1*0103    | 493.293    | -108.563 | 2.488        | -0.940   | 32.625              | -7.952   | 0.011                       | -0.039   |
| HLA-DQA1*02      | 1002.782   | -219.350 | 1983.310     | -432.417 | 12.415              | -3.371   | 10.591                      | -2.944   |
| HLA-DQA1*0201    | 1002.782   | -219.350 | 1983.310     | -432.417 | 12.415              | -3.371   | 10.591                      | -2.944   |
| HLA-DQA1*03      | 2035.607   | -443.779 | 1174.533     | -256.680 | 43.688              | -10.414  | 4.842                       | -1.556   |
| HLA-DQA1*0301    | 2035.607   | -443.779 | 1174.533     | -256.680 | 43.688              | -10.414  | 4.842                       | -1.556   |
| HLA-DQA1*04      | 2.444      | -0.928   | 413.684      | -91.238  | 102.087             | -23.275  | 103.866                     | -23.665  |
| HLA-DQA1*0401    | 2.444      | -0.928   | 413.684      | -91.238  | 102.087             | -23.275  | 103.866                     | -23.665  |
| HLA-DQA1*05      | 488.565    | -107.534 | 6.459        | -1.957   | 47.089              | -11.169  | 6.069                       | -1.861   |
| HLA-DQA1*0501    | 488.565    | -107.534 | 6.459        | -1.957   | 47.089              | -11.169  | 6.069                       | -1.861   |
| HLA-DQA1*06      | 37.119     | -8.954   | 6.934        | -2.073   | 27.556              | -6.816   | 27.545                      | -6.814   |
| HLA-DQA1*0601    | 37.119     | -8.954   | 6.934        | -2.073   | 27.556              | -6.816   | 27.545                      | -6.814   |
| HLA-DQB1*02      | 671.616    | -147.352 | 667.391      | -146.433 | 1.246               | -0.578   | 4.017                       | -1.346   |
| HLA-DQB1*0201    | 1744.674   | -380.570 | 28.885       | -7.115   | 2.331               | -0.897   | 5.700                       | -1.770   |
| HLA-DQB1*0202    | 472.551    | -104.049 | 1850.039     | -403.463 | 1.808               | -0.748   | 1.822                       | -0.752   |
| HLA-DQB1*03      | 387.451    | -85.527  | 800.644      | -175.408 | 42.328              | -10.112  | 20.559                      | -5.238   |
| HLA-DQB1*0301    | 1183.774   | -258.688 | 106.163      | -24.168  | 61.065              | -14.258  | 14.874                      | -3.940   |
| HLA-DQB1*0302    | 3407.438   | -741.780 | 664.536      | -145.812 | 0.367               | -0.264   | 4.724                       | -1.527   |
| HLA-DQB1*0303    | 357.122    | -78.924  | 6.215        | -1.897   | 26.234              | -6.519   | 2.536                       | -0.954   |
| HLA-DQB1*0304    | 8.413      | -2.429   | 0.684        | -0.389   | 0.245               | -0.207   | 0.920                       | -0.472   |
| HLA-DQB1*04      | 1.151      | -0.548   | 404.837      | -89.312  | 94.502              | -21.611  | 106.156                     | -24.167  |
| HLA-DQB1*0402    | 1.151      | -0.548   | 404.837      | -89.312  | 94.502              | -21.611  | 106.156                     | -24.167  |
| HLA-DQB1*05      | 216.276    | -48.231  | 14.433       | -3.838   | 51.322              | -12.106  | 26.759                      | -6.637   |
| HLA-DQB1*0501    | 77.120     | -17.794  | 0.002        | -0.016   | 3.974               | -1.335   | 1.003                       | -0.499   |
| HLA-DQB1*0502    | 3.350      | -1.173   | 0.000        | 0.000    | 0.000               | 0.000    | 0.000                       | 0.000    |
| HLA-DQB1*0503    | 410.562    | -90.558  | 87.623       | -20.101  | 47.926              | -11.354  | 26.334                      | -6.542   |
| HLA-DQB1*06      | 2504.339   | -545.608 | 300.830      | -66.663  | 22.240              | -5.619   | 4.273                       | -1.412   |
| HLA-DQB1*0601    | 49.577     | -11.720  | 1.867        | -0.765   | 18.433              | -4.754   | 18.450                      | -4.758   |
| HLA-DQB1*0602    | 2661.709   | -579.794 | 702.755      | -154.123 | 34.436              | -8.356   | 35.058                      | -8.495   |
| HLA-DQB1*0603    | 467.056    | -102.853 | 1.760        | -0.734   | 29.722              | -7.302   | 0.338                       | -0.251   |
| HLA-DQB1*0604    | 0.902      | -0.466   | 14.591       | -3.874   | 73.846              | -17.073  | 70.727                      | -16.387  |
| HLA-DQB1*0609    | 90.902     | -20.821  | 60.527       | -14.139  | 67.605              | -15.699  | 69.233                      | -16.058  |
| HLA-DRB1*01      | 67.228     | -15.616  | 3.868        | -1.308   | 0.427               | -0.290   | 34.231                      | -8.310   |
| HLA-DRB1*0101    | 22.747     | -5.733   | 20.158       | -5.147   | 37.136              | -8.958   | 27.329                      | -6.765   |
| HLA-DRB1*0102    | 15.748     | -4.140   | 3.188        | -1.130   | 3.414               | -1.190   | 4.545                       | -1.481   |
| HLA-DRB1*0103    | 60.231     | -14.074  | 11.226       | -3.093   | 32.173              | -7.851   | 0.000                       | 0.000    |
| HLA-DRB1*03      | 1699.865   | -370.834 | 27.555       | -6.816   | 0.351               | -0.257   | 0.113                       | -0.132   |
| HLA-DRB1*0301    | 1699.865   | -370.834 | 27.555       | -6.816   | 0.351               | -0.257   | 0.113                       | -0.132   |
| HLA-DRB1*04      | 2055.983   | -448.206 | 959.568      | -209.957 | 1.095               | -0.530   | 1.163                       | -0.552   |
| HLA-DRB1*0401    | 1630.963   | -355.864 | 1263.904     | -276.102 | 354.408             | -78.333  | 1.389                       | -0.622   |
| HLA-DRB1*0402    | 92.900     | -21.260  | 10.575       | -2.941   | 0.738               | -0.408   | 2.844                       | -1.038   |
| HLA-DRB1*0403    | 0.096      | -0.121   | 13.537       | -3.631   | 38.627              | -9.290   | 12.598                      | -3.413   |
| HLA-DRB1*0404    | 159.037    | -35.736  | 20.669       | -5.263   | 323.673             | -71.639  | 59.925                      | -14.006  |
| HLA-DRB1*0405    | 247.382    | -55.015  | 75.379       | -17.411  | 15.271              | -4.031   | 96.831                      | -22.122  |
| HLA-DRB1*0407    | 174.840    | -39.188  | 25.707       | -6.401   | 91.063              | -20.856  | 9.961                       | -2.796   |
| HLA-DRB1*0408    | 0.354      | -0.258   | 3.070        | -1.098   | 2.808               | -1.028   | 13.839                      | -3.701   |
| HLA-DRB1*07      | 1002.102   | -219.203 | 1964.008     | -428.224 | 0.000               | 0.000    | 0.000                       | 0.000    |
| HLA-DRB1*0701    | 1002.102   | -219.203 | 1964.008     | -428.224 | 0.000               | 0.000    | 0.000                       | 0.000    |
| HLA-DRB1*08      | 0.137      | -0.148   | 376.731      | -83.193  | 67.397              | -15.654  | 67.521                      | -15.681  |
| HLA-DRB1*0801    | 4.009      | -1.344   | 410.376      | -90.518  | 98.673              | -22.526  | 98.821                      | -22.558  |
| HLA-DRB1*0803    | 37.119     | -8.954   | 6.934        | -2.073   | 27.556              | -6.816   | 27.545                      | -6.814   |
| HLA-DRB1*0804    | 2.576      | -0.964   | 2.697        | -0.998   | 0.736               | -0.408   | 0.738                       | -0.409   |
| HLA-DRB1*09      | 1.049      | -0.515   | 201.602      | -45.030  | 42.273              | -10.100  | 0.965                       | -0.487   |
| HLA-DRB1*0901    | 1.049      | -0.515   | 201.602      | -45.030  | 42.273              | -10.100  | 0.965                       | -0.487   |
| HLA-DRB1*10      | 55.843     | -13.105  | 36.724       | -8.866   | 37.303              | -8.995   | 39.616                      | -9.510   |
| HLA-DRB1*1001    | 55.843     | -13.105  | 36.724       | -8.866   | 37.303              | -8.995   | 39.616                      | -9.510   |
| HLA-DRB1*11      | 762.817    | -167.183 | 35.802       | -8.661   | 0.011               | -0.037   | 25.351                      | -6.321   |
| HLA-DRB1*1101    | 496.474    | -109.255 | 32.287       | -7.876   | 1.890               | -0.772   | 11.120                      | -3.069   |

|               |          |          |         |          |        |         |        |         |
|---------------|----------|----------|---------|----------|--------|---------|--------|---------|
| HLA-DRB1*1102 | 9.240    | -2.626   | 1.704   | -0.717   | 6.174  | -1.887  | 2.636  | -0.981  |
| HLA-DRB1*1103 | 31.340   | -7.664   | 1.061   | -0.519   | 7.782  | -2.278  | 1.424  | -0.633  |
| HLA-DRB1*1104 | 229.586  | -51.134  | 16.207  | -4.246   | 1.550  | -0.671  | 1.291  | -0.592  |
| HLA-DRB1*12   | 95.974   | -21.934  | 4.657   | -1.510   | 67.397 | -15.654 | 67.521 | -15.681 |
| HLA-DRB1*1201 | 95.974   | -21.934  | 4.657   | -1.510   | 67.397 | -15.654 | 67.521 | -15.681 |
| HLA-DRB1*13   | 408.176  | -90.039  | 2.467   | -0.935   | 17.657 | -4.577  | 4.020  | -1.347  |
| HLA-DRB1*1301 | 432.870  | -95.414  | 1.496   | -0.655   | 22.189 | -5.607  | 3.852  | -1.304  |
| HLA-DRB1*1302 | 23.487   | -5.900   | 0.000   | -0.005   | 2.573  | -0.964  | 0.108  | -0.130  |
| HLA-DRB1*1303 | 120.741  | -27.361  | 10.708  | -2.972   | 1.873  | -0.767  | 0.493  | -0.316  |
| HLA-DRB1*14   | 414.389  | -91.391  | 91.839  | -21.027  | 51.940 | -12.242 | 28.904 | -7.119  |
| HLA-DRB1*1401 | 414.389  | -91.391  | 91.839  | -21.027  | 51.940 | -12.242 | 28.904 | -7.119  |
| HLA-DRB1*15   | 2691.402 | -586.244 | 672.651 | -147.577 | 0.043  | -0.078  | 0.000  | 0.000   |
| HLA-DRB1*1501 | 2648.407 | -576.904 | 683.413 | -149.917 | 11.827 | -3.234  | 18.281 | -4.720  |
| HLA-DRB1*1502 | 50.208   | -11.859  | 1.961   | -0.792   | 18.260 | -4.715  | 18.281 | -4.720  |
| HLA-DRB1*16   | 2.425    | -0.923   | 0.544   | -0.336   | 0.043  | -0.078  | 0.000  | 0.000   |
| HLA-DRB1*1601 | 2.425    | -0.923   | 0.544   | -0.336   | 0.043  | -0.078  | 0.000  | 0.000   |

Supplementary Table 5A. HLA-B associations

| Gene  | Amino acid position | Residues    | Classical allele | Unadjusted |    |          | Adj.DRB1,DQA1,DQB1 |    |          | Adj.DRB1,DQA1,DQB1,HLA-B*3906 |    |          |
|-------|---------------------|-------------|------------------|------------|----|----------|--------------------|----|----------|-------------------------------|----|----------|
|       |                     |             |                  | deviance   | df | log10(p) | deviance           | df | log10(p) | deviance                      | df | log10(p) |
| HLA-B | -10                 | A,G         | --               | 139.990    | 1  | -31.572  | 12.629             | 1  | -3.420   | 0.050                         | 1  | -0.084   |
| HLA-B | -11                 | S,W         | --               | 515.372    | 1  | -113.367 | 6.984              | 1  | -2.085   | 0.027                         | 1  | -0.061   |
| HLA-B | -16                 | V,L         | --               | 111.776    | 1  | -25.398  | 0.781              | 1  | -0.424   | 7.452                         | 1  | -2.198   |
| HLA-B | -21                 | M,T         | --               | 57.366     | 1  | -13.442  | 2.397              | 1  | -0.915   | 9.199                         | 1  | -2.616   |
| HLA-B | -23                 | L,R         | --               | 57.366     | 1  | -13.442  | 2.397              | 1  | -0.915   | 9.199                         | 1  | -2.616   |
| HLA-B | -8                  | L,V         | --               | 463.904    | 1  | -102.168 | 6.758              | 1  | -2.030   | 0.006                         | 1  | -0.028   |
| HLA-B | 103                 | V,L         | --               | 74.346     | 1  | -17.183  | 2.091              | 1  | -0.829   | 7.734                         | 1  | -2.266   |
| HLA-B | 109                 | L,F         | --               | 24.928     | 1  | -6.225   | 0.492              | 1  | -0.316   | 0.588                         | 1  | -0.353   |
| HLA-B | 11                  | A,S         | --               | 60.289     | 1  | -14.087  | 81.193             | 1  | -18.689  | 25.653                        | 1  | -6.389   |
| HLA-B | 113                 | H,Y         | --               | 298.490    | 1  | -66.153  | 23.452             | 1  | -5.892   | 10.166                        | 1  | -2.845   |
| HLA-B | 114                 | N,D,H       | --               | 287.098    | 2  | -62.343  | 28.810             | 2  | -6.256   | 17.776                        | 2  | -3.860   |
| HLA-B | 116                 | Y,D,F,L,S   | --               | 263.221    | 4  | -55.035  | 127.112            | 4  | -25.792  | 53.563                        | 4  | -10.187  |
| HLA-B | 12                  | M,V         | --               | 105.243    | 1  | -23.966  | 68.491             | 1  | -15.895  | 19.783                        | 1  | -5.062   |
| HLA-B | 131                 | R,S         | --               | 90.287     | 1  | -20.686  | 18.324             | 1  | -4.730   | 5.694                         | 1  | -1.769   |
| HLA-B | 143                 | T,S         | --               | 54.079     | 1  | -12.715  | 0.819              | 1  | -0.437   | 4.965                         | 1  | -1.587   |
| HLA-B | 145                 | R,L         | --               | 12.880     | 1  | -3.479   | 19.762             | 1  | -5.057   | 21.516                        | 1  | -5.455   |
| HLA-B | 147                 | W,L         | --               | 54.079     | 1  | -12.715  | 0.819              | 1  | -0.437   | 4.965                         | 1  | -1.587   |
| HLA-B | 152                 | V,E         | --               | 58.665     | 1  | -13.728  | 0.187              | 1  | -0.177   | 4.924                         | 1  | -1.577   |
| HLA-B | 156                 | D,R,L,W     | --               | 841.916    | 3  | -181.455 | 35.965             | 3  | -7.118   | 20.525                        | 3  | -3.879   |
| HLA-B | 158                 | A,T         | --               | 107.975    | 1  | -24.565  | 216.964            | 1  | -48.381  | 12.316                        | 1  | -3.348   |
| HLA-B | 162                 | G           | --               | NA         | NA | NA       | NA                 | NA | NA       | NA                            | NA | NA       |
| HLA-B | 163                 | T,E,L       | --               | 576.050    | 2  | -125.088 | 44.058             | 2  | -9.567   | 6.907                         | 2  | -1.500   |
| HLA-B | 166                 | E           | --               | NA         | NA | NA       | NA                 | NA | NA       | NA                            | NA | NA       |
| HLA-B | 167                 | W,S         | --               | 230.458    | 1  | -51.325  | 12.271             | 1  | -3.337   | 5.835                         | 1  | -1.804   |
| HLA-B | 171                 | Y,H         | --               | 0.023      | 1  | -0.055   | 25.644             | 1  | -6.387   | 35.788                        | 1  | -8.658   |
| HLA-B | 177                 | D,E         | --               | 113.348    | 1  | -25.742  | 13.267             | 1  | -3.569   | 3.225                         | 1  | -1.139   |
| HLA-B | 178                 | T,K         | --               | 126.088    | 1  | -28.532  | 3.070              | 1  | -1.098   | 12.287                        | 1  | -3.341   |
| HLA-B | 180                 | E,Q         | --               | 113.348    | 1  | -25.742  | 13.267             | 1  | -3.569   | 3.225                         | 1  | -1.139   |
| HLA-B | 194                 | I,V         | --               | 133.368    | 1  | -30.124  | 12.077             | 1  | -3.292   | 3.643                         | 1  | -1.249   |
| HLA-B | 199                 | A,V         | --               | 217.041    | 1  | -48.398  | 10.213             | 1  | -2.856   | 4.549                         | 1  | -1.482   |
| HLA-B | 211                 | A           | --               | NA         | NA | NA       | NA                 | NA | NA       | NA                            | NA | NA       |
| HLA-B | 239                 | R           | --               | NA         | NA | NA       | NA                 | NA | NA       | NA                            | NA | NA       |
| HLA-B | 24                  | S,T,A       | --               | 156.174    | 2  | -33.913  | 52.964             | 2  | -11.501  | 13.167                        | 2  | -2.859   |
| HLA-B | 245                 | A           | --               | NA         | NA | NA       | NA                 | NA | NA       | NA                            | NA | NA       |
| HLA-B | 253                 | E           | --               | NA         | NA | NA       | NA                 | NA | NA       | NA                            | NA | NA       |
| HLA-B | 267                 | P           | --               | NA         | NA | NA       | NA                 | NA | NA       | NA                            | NA | NA       |
| HLA-B | 268                 | K           | --               | NA         | NA | NA       | NA                 | NA | NA       | NA                            | NA | NA       |
| HLA-B | 270                 | L           | --               | NA         | NA | NA       | NA                 | NA | NA       | NA                            | NA | NA       |
| HLA-B | 275                 | E           | --               | NA         | NA | NA       | NA                 | NA | NA       | NA                            | NA | NA       |
| HLA-B | 282                 | V,I         | --               | 82.794     | 1  | -19.041  | 10.852             | 1  | -3.006   | 29.247                        | 1  | -7.196   |
| HLA-B | 295                 | A           | --               | NA         | NA | NA       | NA                 | NA | NA       | NA                            | NA | NA       |
| HLA-B | 296                 | V           | --               | NA         | NA | NA       | NA                 | NA | NA       | NA                            | NA | NA       |
| HLA-B | 298                 | V           | --               | NA         | NA | NA       | NA                 | NA | NA       | NA                            | NA | NA       |
| HLA-B | 299                 | I           | --               | NA         | NA | NA       | NA                 | NA | NA       | NA                            | NA | NA       |
| HLA-B | 30                  | D,G         | --               | 177.265    | 1  | -39.717  | 99.292             | 1  | -22.662  | 107.567                       | 1  | -24.476  |
| HLA-B | 300                 | G           | --               | NA         | NA | NA       | NA                 | NA | NA       | NA                            | NA | NA       |
| HLA-B | 305                 | A,T         | --               | 77.196     | 1  | -17.810  | 10.114             | 1  | -2.832   | 27.982                        | 1  | -6.912   |
| HLA-B | 307                 | M,V         | --               | 5.552      | 1  | -1.734   | 0.817              | 1  | -0.436   | 0.909                         | 1  | -0.468   |
| HLA-B | 32                  | Q,L         | --               | 70.759     | 1  | -16.394  | 10.540             | 1  | -2.932   | 1.030                         | 1  | -0.508   |
| HLA-B | 325                 | C,S,x       | --               | 75.950     | 2  | -16.492  | 69.397             | 2  | -15.069  | 28.970                        | 2  | -6.291   |
| HLA-B | 4                   | S,F         | --               | 0.646      | 1  | -0.375   | 1.592              | 1  | -0.684   | 1.621                         | 1  | -0.693   |
| HLA-B | 41                  | A,T         | --               | 69.739     | 1  | -16.169  | 0.530              | 1  | -0.331   | 7.258                         | 1  | -2.151   |
| HLA-B | 45                  | E,K,M,T     | --               | 91.320     | 3  | -18.943  | 10.326             | 3  | -1.796   | 30.848                        | 3  | -6.039   |
| HLA-B | 46                  | E,A         | --               | 32.592     | 1  | -7.944   | 1.929              | 1  | -0.783   | 0.281                         | 1  | -0.225   |
| HLA-B | 52                  | I           | --               | NA         | NA | NA       | NA                 | NA | NA       | NA                            | NA | NA       |
| HLA-B | 59                  | Y,H         | --               | 0.986      | 1  | -0.494   | 0.502              | 1  | -0.320   | 0.507                         | 1  | -0.322   |
| HLA-B | 62                  | R,G         | --               | 308.900    | 1  | -68.421  | 20.281             | 1  | -5.175   | 17.777                        | 1  | -4.605   |
| HLA-B | 63                  | N,E         | --               | 36.432     | 1  | -8.801   | 18.762             | 1  | -4.830   | 2.000                         | 1  | -0.803   |
| HLA-B | 65                  | Q,R         | --               | 291.294    | 1  | -64.585  | 17.950             | 1  | -4.644   | 15.647                        | 1  | -4.117   |
| HLA-B | 66                  | I,N         | --               | 291.294    | 1  | -64.585  | 17.950             | 1  | -4.644   | 15.647                        | 1  | -4.117   |
| HLA-B | 67                  | F,Y,S,C,M   | --               | 808.622    | 4  | -172.982 | 97.390             | 4  | -19.452  | 85.253                        | 4  | -16.873  |
| HLA-B | 69                  | T,A         | --               | 656.023    | 1  | -143.961 | 13.440             | 1  | -3.609   | 4.444                         | 1  | -1.456   |
| HLA-B | 70                  | N,Q,S,K     | --               | 774.055    | 3  | -166.737 | 47.828             | 3  | -9.635   | 38.854                        | 3  | -7.730   |
| HLA-B | 71                  | T,A         | --               | 656.023    | 1  | -143.961 | 13.440             | 1  | -3.609   | 4.444                         | 1  | -1.456   |
| HLA-B | 74                  | D,Y         | --               | 29.030     | 1  | -7.147   | 0.773              | 1  | -0.421   | 22.235                        | 1  | -5.618   |
| HLA-B | 76                  | E           | --               | NA         | NA | NA       | NA                 | NA | NA       | NA                            | NA | NA       |
| HLA-B | 77                  | S,N,D       | --               | 557.867    | 2  | -121.139 | 44.473             | 2  | -9.657   | 22.582                        | 2  | -4.904   |
| HLA-B | 80                  | N,T,I       | --               | 550.155    | 2  | -119.465 | 39.484             | 2  | -8.574   | 18.907                        | 2  | -4.106   |
| HLA-B | 81                  | L,A         | --               | 496.960    | 1  | -109.361 | 14.755             | 1  | -3.912   | 5.177                         | 1  | -1.640   |
| HLA-B | 82                  | R,L         | --               | 541.380    | 1  | -119.025 | 37.816             | 1  | -9.109   | 17.196                        | 1  | -4.472   |
| HLA-B | 83                  | G,R         | --               | 541.380    | 1  | -119.025 | 37.816             | 1  | -9.109   | 17.196                        | 1  | -4.472   |
| HLA-B | 9                   | D,Y,H       | --               | 837.074    | 2  | -181.768 | 55.080             | 2  | -11.961  | 59.813                        | 2  | -12.988  |
| HLA-B | 90                  | A           | --               | NA         | NA | NA       | NA                 | NA | NA       | NA                            | NA | NA       |
| HLA-B | 94                  | T,I         | --               | 605.998    | 1  | -133.081 | 39.389             | 1  | -9.459   | 20.836                        | 1  | -5.301   |
| HLA-B | 95                  | L,I,W       | --               | 679.536    | 2  | -147.559 | 143.187            | 2  | -31.093  | 38.427                        | 2  | -8.344   |
| HLA-B | 97                  | S,R,T,W,V,N | --               | 519.869    | 5  | -109.387 | 184.214            | 5  | -37.172  | 88.786                        | 5  | -16.918  |



|       |    |       |            |         |   |          |         |   |         |         |   |         |
|-------|----|-------|------------|---------|---|----------|---------|---|---------|---------|---|---------|
| HLA-B | 99 | Y,S,F | --         | 47.202  | 2 | -10.250  | 2.180   | 2 | -0.473  | 1.400   | 2 | -0.304  |
| HLA-B | -- | --    | HLA-B*07   | 379.502 | 1 | -83.797  | 1.602   | 1 | -0.687  | 5.088   | 1 | -1.618  |
| HLA-B | -- | --    | HLA-B*0702 | 406.312 | 1 | -89.633  | 1.149   | 1 | -0.547  | 4.266   | 1 | -1.410  |
| HLA-B | -- | --    | HLA-B*0705 | 10.866  | 1 | -3.009   | 1.730   | 1 | -0.725  | 1.858   | 1 | -0.762  |
| HLA-B | -- | --    | HLA-B*08   | 605.271 | 1 | -132.923 | 50.532  | 1 | -11.931 | 42.215  | 1 | -10.087 |
| HLA-B | -- | --    | HLA-B*0801 | 605.271 | 1 | -132.923 | 50.532  | 1 | -11.931 | 42.215  | 1 | -10.087 |
| HLA-B | -- | --    | HLA-B*13   | 12.880  | 1 | -3.479   | 19.331  | 1 | -4.959  | 21.058  | 1 | -5.351  |
| HLA-B | -- | --    | HLA-B*1302 | 12.880  | 1 | -3.479   | 19.331  | 1 | -4.959  | 21.058  | 1 | -5.351  |
| HLA-B | -- | --    | HLA-B*14   | 126.825 | 1 | -28.693  | 9.428   | 1 | -2.670  | 8.061   | 1 | -2.345  |
| HLA-B | -- | --    | HLA-B*1401 | 57.334  | 1 | -13.435  | 6.551   | 1 | -1.980  | 5.898   | 1 | -1.819  |
| HLA-B | -- | --    | HLA-B*1402 | 71.975  | 1 | -16.662  | 3.632   | 1 | -1.247  | 2.944   | 1 | -1.064  |
| HLA-B | -- | --    | HLA-B*15   | 320.159 | 1 | -70.874  | 3.511   | 1 | -1.215  | 1.169   | 1 | -0.554  |
| HLA-B | -- | --    | HLA-B*1501 | 339.432 | 1 | -75.072  | 4.086   | 1 | -1.364  | 1.545   | 1 | -0.670  |
| HLA-B | -- | --    | HLA-B*1503 | 1.995   | 1 | -0.802   | 0.153   | 1 | -0.157  | 0.119   | 1 | -0.136  |
| HLA-B | -- | --    | HLA-B*1516 | 0.646   | 1 | -0.375   | 1.403   | 1 | -0.627  | 1.434   | 1 | -0.636  |
| HLA-B | -- | --    | HLA-B*1517 | 1.261   | 1 | -0.582   | 0.635   | 1 | -0.371  | 0.581   | 1 | -0.351  |
| HLA-B | -- | --    | HLA-B*1518 | 2.429   | 1 | -0.924   | 0.515   | 1 | -0.325  | 0.744   | 1 | -0.411  |
| HLA-B | -- | --    | HLA-B*18   | 175.373 | 1 | -39.304  | 94.552  | 1 | -21.622 | 102.625 | 1 | -23.393 |
| HLA-B | -- | --    | HLA-B*1801 | 175.373 | 1 | -39.304  | 94.552  | 1 | -21.622 | 102.625 | 1 | -23.393 |
| HLA-B | -- | --    | HLA-B*27   | 9.447   | 1 | -2.675   | 29.836  | 1 | -7.328  | 20.405  | 1 | -5.203  |
| HLA-B | -- | --    | HLA-B*2702 | 7.016   | 1 | -2.093   | 3.997   | 1 | -1.341  | 3.276   | 1 | -1.153  |
| HLA-B | -- | --    | HLA-B*2705 | 7.164   | 1 | -2.129   | 27.236  | 1 | -6.745  | 18.440  | 1 | -4.756  |
| HLA-B | -- | --    | HLA-B*35   | 91.606  | 1 | -20.976  | 12.342  | 1 | -3.354  | 5.164   | 1 | -1.637  |
| HLA-B | -- | --    | HLA-B*3501 | 73.127  | 1 | -16.915  | 16.067  | 1 | -4.214  | 8.396   | 1 | -2.425  |
| HLA-B | -- | --    | HLA-B*3502 | 24.928  | 1 | -6.225   | 0.519   | 1 | -0.327  | 0.618   | 1 | -0.365  |
| HLA-B | -- | --    | HLA-B*3503 | 4.331   | 1 | -1.427   | 0.315   | 1 | -0.241  | 0.000   | 1 | -0.007  |
| HLA-B | -- | --    | HLA-B*3508 | 0.419   | 1 | -0.286   | 0.109   | 1 | -0.130  | 0.182   | 1 | -0.174  |
| HLA-B | -- | --    | HLA-B*37   | 41.849  | 1 | -10.006  | 1.587   | 1 | -0.682  | 0.623   | 1 | -0.366  |
| HLA-B | -- | --    | HLA-B*3701 | 41.849  | 1 | -10.006  | 1.587   | 1 | -0.682  | 0.623   | 1 | -0.366  |
| HLA-B | -- | --    | HLA-B*38   | 5.636   | 1 | -1.755   | 0.122   | 1 | -0.139  | 0.307   | 1 | -0.237  |
| HLA-B | -- | --    | HLA-B*3801 | 5.636   | 1 | -1.755   | 0.122   | 1 | -0.139  | 0.307   | 1 | -0.237  |
| HLA-B | -- | --    | HLA-B*39   | 190.172 | 1 | -42.535  | 300.959 | 1 | -66.691 | 26.170  | 1 | -6.505  |
| HLA-B | -- | --    | HLA-B*3901 | 2.407   | 1 | -0.918   | 18.447  | 1 | -4.758  | 26.170  | 1 | -6.505  |
| HLA-B | -- | --    | HLA-B*3906 | 273.147 | 1 | -60.631  | 340.953 | 1 | -75.403 | NA      | 1 | NA      |
| HLA-B | -- | --    | HLA-B*40   | 23.614  | 1 | -5.929   | 0.084   | 1 | -0.113  | 1.148   | 1 | -0.547  |
| HLA-B | -- | --    | HLA-B*4001 | 54.079  | 1 | -12.715  | 0.641   | 1 | -0.373  | 4.514   | 1 | -1.474  |
| HLA-B | -- | --    | HLA-B*4002 | 34.494  | 1 | -8.369   | 9.756   | 1 | -2.748  | 7.993   | 1 | -2.328  |
| HLA-B | -- | --    | HLA-B*4006 | 0.329   | 1 | -0.247   | 0.015   | 1 | -0.044  | 0.000   | 1 | -0.005  |
| HLA-B | -- | --    | HLA-B*41   | 4.395   | 1 | -1.443   | 0.061   | 1 | -0.094  | 0.188   | 1 | -0.177  |
| HLA-B | -- | --    | HLA-B*4101 | 7.354   | 1 | -2.175   | 4.537   | 1 | -1.479  | 5.094   | 1 | -1.620  |
| HLA-B | -- | --    | HLA-B*4102 | 38.744  | 1 | -9.316   | 4.600   | 1 | -1.495  | 4.047   | 1 | -1.354  |
| HLA-B | -- | --    | HLA-B*44   | 216.012 | 1 | -48.174  | 7.291   | 1 | -2.159  | 2.703   | 1 | -0.999  |
| HLA-B | -- | --    | HLA-B*4402 | 46.772  | 1 | -11.098  | 0.721   | 1 | -0.402  | 3.586   | 1 | -1.235  |
| HLA-B | -- | --    | HLA-B*4403 | 252.460 | 1 | -56.122  | 46.733  | 1 | -11.090 | 43.228  | 1 | -10.312 |
| HLA-B | -- | --    | HLA-B*4405 | 0.034   | 1 | -0.068   | 3.025   | 1 | -1.086  | 3.876   | 1 | -1.310  |
| HLA-B | -- | --    | HLA-B*45   | 10.274  | 1 | -2.870   | 2.132   | 1 | -0.841  | 1.680   | 1 | -0.710  |
| HLA-B | -- | --    | HLA-B*4501 | 10.274  | 1 | -2.870   | 2.132   | 1 | -0.841  | 1.680   | 1 | -0.710  |
| HLA-B | -- | --    | HLA-B*47   | 5.552   | 1 | -1.734   | 0.803   | 1 | -0.432  | 0.896   | 1 | -0.464  |
| HLA-B | -- | --    | HLA-B*4701 | 5.552   | 1 | -1.734   | 0.803   | 1 | -0.432  | 0.896   | 1 | -0.464  |
| HLA-B | -- | --    | HLA-B*49   | 9.184   | 1 | -2.612   | 1.201   | 1 | -0.564  | 0.871   | 1 | -0.455  |
| HLA-B | -- | --    | HLA-B*4901 | 9.184   | 1 | -2.612   | 1.201   | 1 | -0.564  | 0.871   | 1 | -0.455  |
| HLA-B | -- | --    | HLA-B*50   | 21.799  | 1 | -5.519   | 70.981  | 1 | -16.443 | 73.329  | 1 | -16.960 |
| HLA-B | -- | --    | HLA-B*5001 | 21.799  | 1 | -5.519   | 70.981  | 1 | -16.443 | 73.329  | 1 | -16.960 |
| HLA-B | -- | --    | HLA-B*51   | 18.807  | 1 | -4.840   | 1.274   | 1 | -0.587  | 0.080   | 1 | -0.109  |
| HLA-B | -- | --    | HLA-B*5101 | 18.807  | 1 | -4.840   | 1.274   | 1 | -0.587  | 0.080   | 1 | -0.109  |
| HLA-B | -- | --    | HLA-B*52   | 25.876  | 1 | -6.439   | 0.811   | 1 | -0.434  | 1.205   | 1 | -0.565  |
| HLA-B | -- | --    | HLA-B*5201 | 25.876  | 1 | -6.439   | 0.811   | 1 | -0.434  | 1.205   | 1 | -0.565  |
| HLA-B | -- | --    | HLA-B*53   | 2.175   | 1 | -0.853   | 1.814   | 1 | -0.750  | 1.636   | 1 | -0.697  |
| HLA-B | -- | --    | HLA-B*5301 | 2.175   | 1 | -0.853   | 1.814   | 1 | -0.750  | 1.636   | 1 | -0.697  |
| HLA-B | -- | --    | HLA-B*55   | 31.817  | 1 | -7.771   | 0.403   | 1 | -0.279  | 0.113   | 1 | -0.133  |
| HLA-B | -- | --    | HLA-B*5501 | 31.817  | 1 | -7.771   | 0.403   | 1 | -0.279  | 0.113   | 1 | -0.133  |
| HLA-B | -- | --    | HLA-B*56   | 0.368   | 1 | -0.264   | 0.021   | 1 | -0.053  | 0.323   | 1 | -0.244  |
| HLA-B | -- | --    | HLA-B*5601 | 0.368   | 1 | -0.264   | 0.021   | 1 | -0.053  | 0.323   | 1 | -0.244  |
| HLA-B | -- | --    | HLA-B*57   | 356.914 | 1 | -78.878  | 28.796  | 1 | -7.095  | 25.807  | 1 | -6.423  |
| HLA-B | -- | --    | HLA-B*5701 | 356.914 | 1 | -78.878  | 28.796  | 1 | -7.095  | 25.807  | 1 | -6.423  |
| HLA-B | -- | --    | HLA-B*58   | 2.140   | 1 | -0.843   | 0.047   | 1 | -0.082  | 0.091   | 1 | -0.117  |
| HLA-B | -- | --    | HLA-B*5801 | 2.140   | 1 | -0.843   | 0.047   | 1 | -0.082  | 0.091   | 1 | -0.117  |







**Supplementary Table 6A. Haplotypes defined by top three amino acid positions (with at least 4 counts in the datasets)**

| DQβ1#57 | DRβ1#13 | DRβ1#71 | OR.regressio | OR.low   | OR.high  | CtrlFreq   | CaseFreq | P          |
|---------|---------|---------|--------------|----------|----------|------------|----------|------------|
| A       | G       | R       | 4.45506887   | 1.55E+00 | 1.28E+01 | 4.66E-05   | 5.56E-04 | 0.1566434  |
| A       | H       | K       | 2.12696421   | 2.04E+00 | 2.22E+00 | 0.05043778 | 2.48E-01 | 6.5823E-73 |
| A       | H       | E       | 1.32743553   | 1.18E+00 | 1.50E+00 | 0.00479695 | 1.55E-02 | 0.01952865 |
| A       | S       | K       | 1            | 1.00E+00 | 1.00E+00 | 0.14539866 | 3.32E-01 | NA         |
| A       | H       | R       | 0.88520108   | 8.46E-01 | 9.26E-01 | 0.05374441 | 1.07E-01 | 0.00750154 |
| A       | S       | R       | 0.65235867   | 3.70E-01 | 1.15E+00 | 0.00027943 | 4.32E-04 | 0.4510501  |
| A       | S       | E       | 0.52732962   | 3.37E-01 | 8.24E-01 | 0.0005123  | 6.18E-04 | 0.1520597  |
| D       | F       | R       | 0.48059572   | 4.37E-01 | 5.29E-01 | 0.01220194 | 1.38E-02 | 2.4498E-14 |
| A       | F       | R       | 0.4592914    | 3.15E-01 | 6.69E-01 | 0.00074516 | 8.65E-04 | 0.03858478 |
| S       | R       | A       | 0.4193292    | 2.45E-01 | 7.18E-01 | 0.00041915 | 3.71E-04 | 0.1059262  |
| S       | R       | R       | 0.37333811   | 3.29E-01 | 4.23E-01 | 0.00796386 | 6.98E-03 | 5.4459E-15 |
| V       | F       | R       | 0.34841626   | 3.34E-01 | 3.63E-01 | 0.10627794 | 8.54E-02 | 6.009E-140 |
| V       | S       | E       | 0.33521011   | 3.15E-01 | 3.57E-01 | 0.04005216 | 3.04E-02 | 5.0701E-69 |
| D       | G       | R       | 0.32383004   | 3.04E-01 | 3.45E-01 | 0.03902757 | 2.94E-02 | 2.6324E-71 |
| S       | F       | R       | 0.28593292   | 8.78E-02 | 9.31E-01 | 0.00013972 | 6.18E-05 | 0.2891969  |
| D       | H       | K       | 0.27424326   | 2.60E-01 | 2.89E-01 | 0.06832154 | 4.18E-02 | 5.078E-132 |
| V       | F       | E       | 0.23674079   | 2.10E-01 | 2.67E-01 | 0.01271423 | 6.49E-03 | 1.4495E-33 |
| A       | Y       | R       | 0.18334782   | 1.74E-01 | 1.93E-01 | 0.10320417 | 4.26E-02 | 1.055E-251 |
| V       | S       | R       | 0.13582202   | 4.40E-02 | 4.19E-01 | 0.00018629 | 6.18E-05 | 0.07632222 |
| D       | S       | E       | 0.11298365   | 1.05E-01 | 1.22E-01 | 0.05770306 | 1.46E-02 | 1.749E-183 |
| D       | F       | E       | 0.07579911   | 5.48E-02 | 1.05E-01 | 0.00414493 | 6.79E-04 | 1.7044E-15 |
| D       | H       | R       | 0.06223769   | 5.24E-02 | 7.39E-02 | 0.01709203 | 2.41E-03 | 5.8672E-59 |
| D       | S       | K       | 0.06018088   | 4.82E-02 | 7.52E-02 | 0.01019933 | 1.42E-03 | 1.2931E-36 |
| V       | R       | A       | 0.05775748   | 2.00E-02 | 1.67E-01 | 0.00041915 | 6.18E-05 | 0.00721181 |
| D       | S       | R       | 0.05459938   | 5.02E-02 | 5.94E-02 | 0.0826658  | 1.03E-02 | 2.751E-257 |
| D       | Y       | R       | 0.02908179   | 2.48E-02 | 3.41E-02 | 0.04051788 | 2.66E-03 | 2.971E-110 |
| D       | R       | A       | 0.01788334   | 1.60E-02 | 2.00E-02 | 0.14008942 | 5.50E-03 | 2.668E-291 |
| S       | S       | R       | 2.0647E-06   | 9.02E-69 | 4.73E+56 | 0.00023286 | 0.00E+00 | 0.9273609  |
| V       | S       | K       | 1.763E-06    | 7.96E-64 | 3.90E+51 | 0.00027943 | 0.00E+00 | 0.9200792  |



**Supplementary Table 7A. Top 1000 combinations of 2AA's**

| <b>AA1</b>  | <b>AA2</b>  | <b>DeltaDeviance</b> | <b>df</b> | <b>P</b>   | <b>Residues</b>      |
|-------------|-------------|----------------------|-----------|------------|----------------------|
| AA_DQB1_57  | AA_DRB1_13  | 9661.011751          | 19        | -2071.624  | aa1 ADVS aa2 SRHFGY  |
| AA_DQB1_57  | AA_DRB1_11  | 9404.827094          | 18        | -2017.4585 | aa1 ADVS aa2 SPVLGD  |
| AA_DQB1_57  | AA_DRB1_37  | 9324.046636          | 15        | -2004.1168 | aa1 ADVS aa2 NSYFL   |
| AA_DQA1_47  | AA_DQB1_57  | 9245.520421          | 10        | -1994.3595 | aa1 CRQK aa2 ADVS    |
| AA_DQB1_57  | AA_DRB1_9   | 9111.50804           | 9         | -1966.7992 | aa1 ADVS aa2 EWK     |
| AA_DQA1_52  | AA_DQB1_57  | 9032.194409          | 8         | -1951.1297 | aa1 RSH aa2 ADVS     |
| AA_DQB1_57  | AA_DRB1_74  | 8768.560717          | 15        | -1883.6679 | aa1 ADVS aa2 RALQE   |
| AA_DQB1_57  | AA_DRB1_181 | 8564.448428          | 8         | -1849.6292 | aa1 ADVS aa2 TxM     |
| AA_DQB1_57  | AA_DRB1_67  | 8533.010207          | 11        | -1838.3027 | aa1 ADVS aa2 LIF     |
| AA_DQB1_57  | AA_DRB1_57  | 8507.090134          | 12        | -1831.2261 | aa1 ADVS aa2 DSVA    |
| AA_DQB1_57  | AA_DRB1_140 | 8501.312677          | 7         | -1837.4868 | aa1 ADVS aa2 TA      |
| AA_DQB1_57  | AA_DRB1_30  | 8477.663278          | 13        | -1823.41   | aa1 ADVS aa2 YCLRGH  |
| AA_DQB1_26  | AA_DRB1_13  | 8421.998337          | 17        | -1805.7772 | aa1 LYG aa2 SRHFGY   |
| AA_DQB1_57  | AA_DRB1_28  | 8365.142172          | 9         | -1804.8578 | aa1 ADVS aa2 DEH     |
| AA_DQA1_47  | AA_DQB1_26  | 8342.880208          | 11        | -1797.0605 | aa1 CRQK aa2 LYG     |
| AA_DQB1_57  | AA_DRB1_71  | 8236.643941          | 13        | -1771.1422 | aa1 ADVS aa2 KAER    |
| AA_DQA1_54  | AA_DQB1_57  | 8236.287389          | 5         | -1783.1885 | aa1 FL aa2 ADVS      |
| AA_DQB1_57  | AA_DRB1_25  | 8219.411599          | 5         | -1779.5253 | aa1 ADVS aa2 RQ      |
| AA_DQB1_57  | AA_DRB1_14  | 8219.411599          | 5         | -1779.5253 | aa1 ADVS aa2 EK      |
| AA_DQB1_57  | AA_DRB1_60  | 8193.263316          | 9         | -1767.5663 | aa1 ADVS aa2 YSH     |
| AA_DQA1_25  | AA_DQB1_57  | 8178.191553          | 5         | -1770.5778 | aa1 YF aa2 ADVS      |
| AA_DQB1_26  | AA_DRB1_37  | 8159.262554          | 12        | -1755.7869 | aa1 LYG aa2 NSYFL    |
| AA_DQB1_71  | AA_DRB1_11  | 8130.699637          | 20        | -1738.6359 | aa1 KTAD aa2 SPVLGD  |
| AA_DQB1_26  | AA_DRB1_11  | 8119.857477          | 15        | -1743.0207 | aa1 LYG aa2 SPVLGD   |
| AA_DQB1_57  | AA_DRB1_4   | 8100.501681          | 5         | -1753.7138 | aa1 ADVS aa2 RQ      |
| AA_DQB1_57  | AA_DRB1_78  | 8099.534066          | 5         | -1753.5038 | aa1 ADVS aa2 YV      |
| AA_DQB1_135 | AA_DQB1_57  | 8099.27327           | 4         | -1755.1273 | aa1 DG aa2 ADVS      |
| AA_DQB1_71  | AA_DRB1_13  | 8063.92442           | 21        | -1722.8598 | aa1 KTAD aa2 SRHFGY  |
| AA_DQB1_74  | AA_DRB1_13  | 8059.423028          | 16        | -1728.5462 | aa1 AES aa2 SRHFGY   |
| AA_DQA1_52  | AA_DQB1_26  | 8049.653735          | 8         | -1737.9237 | aa1 RSH aa2 LYG      |
| AA_DQB1_185 | AA_DRB1_74  | 8048.663141          | 9         | -1736.1938 | aa1 TI aa2 RALQE     |
| AA_DQB1_30  | AA_DRB1_13  | 7927.16276           | 16        | -1699.8766 | aa1 SYH aa2 SRHFGY   |
| AA_DQB1_-10 | AA_DRB1_13  | 7924.307845          | 14        | -1702.0107 | aa1 Sx aa2 SRHFGY    |
| AA_DQB1_57  | AA_DRB1_70  | 7901.711484          | 11        | -1701.3681 | aa1 ADVS aa2 QDR     |
| AA_DQB1_74  | AA_DRB1_11  | 7813.522727          | 16        | -1675.2438 | aa1 AES aa2 SPVLGD   |
| AA_DQB1_26  | AA_DRB1_67  | 7803.595344          | 8         | -1684.5332 | aa1 LYG aa2 LIF      |
| AA_DRB1_74  | AA_DRB1_13  | 7788.515928          | 10        | -1678.2728 | aa1 RALQE aa2 SRHFGY |
| AA_DQB1_57  | AA_DRB1_180 | 7781.584219          | 8         | -1679.7572 | aa1 ADVS aa2 VLx     |
| AA_DQB1_57  | AA_DRB1_96  | 7764.845381          | 14        | -1667.4368 | aa1 ADVS aa2 HQYE    |
| AA_DQA1_56  | AA_DQB1_57  | 7761.859123          | 8         | -1675.4773 | aa1 xGR aa2 ADVS     |
| AA_DQA1_76  | AA_DQB1_57  | 7761.859123          | 8         | -1675.4773 | aa1 LMV aa2 ADVS     |
| AA_DQB1_30  | AA_DRB1_11  | 7735.351279          | 16        | -1658.2997 | aa1 SYH aa2 SPVLGD   |

|             |             |             |    |            |                      |
|-------------|-------------|-------------|----|------------|----------------------|
| AA_DRB1_70  | AA_DRB1_13  | 7728.548278 | 11 | -1663.8095 | aa1 QDR aa2 SRHFGY   |
| AA_DQB1_-18 | AA_DRB1_37  | 7724.607689 | 11 | -1662.9548 | aa1 AVx aa2 NSYFL    |
| AA_DQB1_-18 | AA_DRB1_13  | 7712.879107 | 15 | -1654.7916 | aa1 AVx aa2 SRHFGY   |
| AA_DRB1_71  | AA_DRB1_13  | 7704.333349 | 11 | -1658.5574 | aa1 KAER aa2 SRHFGY  |
| AA_DQB1_55  | AA_DRB1_13  | 7701.634198 | 16 | -1650.9914 | aa1 LRP aa2 SRHFGY   |
| AA_DQA1_47  | AA_DQB1_167 | 7697.122294 | 7  | -1662.9669 | aa1 CRQK aa2 RH      |
| AA_DQA1_47  | AA_DQB1_13  | 7694.046593 | 7  | -1662.2995 | aa1 CRQK aa2 GA      |
| AA_DQA1_47  | AA_DQB1_45  | 7685.605546 | 6  | -1662.0395 | aa1 CRQK aa2 GE      |
| AA_DRB1_74  | AA_DRB1_11  | 7684.834392 | 10 | -1655.7819 | aa1 RALQE aa2 SPVLGD |
| AA_DQB1_57  | AA_DRB1_-24 | 7677.184535 | 9  | -1655.6001 | aa1 ADVS aa2 LFX     |
| AA_DQB1_26  | AA_DRB1_71  | 7675.602012 | 11 | -1652.3258 | aa1 LYG aa2 KAER     |
| AA_DRB1_70  | AA_DRB1_11  | 7652.002895 | 11 | -1647.2073 | aa1 QDR aa2 SPVLGD   |
| AA_DQB1_167 | AA_DRB1_71  | 7627.834085 | 7  | -1647.931  | aa1 RH aa2 KAER      |
| AA_DQB1_13  | AA_DRB1_71  | 7626.192522 | 7  | -1647.5748 | aa1 GA aa2 KAER      |
| AA_DQB1_45  | AA_DRB1_71  | 7609.986933 | 7  | -1644.0581 | aa1 GE aa2 KAER      |
| AA_DQB1_55  | AA_DRB1_11  | 7598.06204  | 16 | -1628.5421 | aa1 LRP aa2 SPVLGD   |
| AA_DQB1_67  | AA_DRB1_13  | 7593.07385  | 11 | -1634.4261 | aa1 IV aa2 SRHFGY    |
| AA_DQB1_66  | AA_DRB1_13  | 7593.07385  | 11 | -1634.4261 | aa1 DE aa2 SRHFGY    |
| AA_DQB1_140 | AA_DQB1_57  | 7575.150444 | 5  | -1639.6789 | aa1 AT aa2 ADVS      |
| AA_DQB1_182 | AA_DQB1_57  | 7574.970429 | 5  | -1639.6399 | aa1 SN aa2 ADVS      |
| AA_DRB1_96  | AA_DRB1_74  | 7534.904342 | 8  | -1626.2334 | aa1 HQYE aa2 RALQE   |
| AA_DQB1_37  | AA_DRB1_13  | 7508.125843 | 11 | -1616.0019 | aa1 IYD aa2 SRHFGY   |
| AA_DQB1_52  | AA_DRB1_13  | 7505.964505 | 10 | -1616.9817 | aa1 LP aa2 SRHFGY    |
| AA_DQB1_47  | AA_DRB1_13  | 7503.520838 | 10 | -1616.4517 | aa1 FY aa2 SRHFGY    |
| AA_DQB1_46  | AA_DRB1_13  | 7503.520838 | 10 | -1616.4517 | aa1 EV aa2 SRHFGY    |
| AA_DQB1_28  | AA_DRB1_13  | 7503.520838 | 10 | -1616.4517 | aa1 ST aa2 SRHFGY    |
| AA_DQB1_-10 | AA_DRB1_11  | 7503.185891 | 15 | -1609.3351 | aa1 SAX aa2 SPVLGD   |
| AA_DQA1_47  | AA_DQB1_30  | 7490.357445 | 9  | -1615.0685 | aa1 CRQK aa2 SYH     |
| AA_DQA1_187 | AA_DQB1_57  | 7476.085635 | 6  | -1616.5669 | aa1 AT aa2 ADVS      |
| AA_DQA1_26  | AA_DQB1_57  | 7476.085635 | 6  | -1616.5669 | aa1 TS aa2 ADVS      |
| AA_DQB1_87  | AA_DRB1_70  | 7458.645072 | 7  | -1611.2164 | aa1 LFY aa2 QDR      |
| AA_DQB1_167 | AA_DRB1_13  | 7437.465104 | 11 | -1600.6766 | aa1 RH aa2 SRHFGY    |
| AA_DQB1_13  | AA_DRB1_13  | 7434.444209 | 11 | -1600.0214 | aa1 GA aa2 SRHFGY    |
| AA_DQB1_45  | AA_DRB1_13  | 7430.342615 | 11 | -1599.1318 | aa1 GE aa2 SRHFGY    |
| AA_DQB1_-5  | AA_DRB1_70  | 7428.904028 | 9  | -1601.7366 | aa1 PLSx aa2 QDR     |
| AA_DQB1_185 | AA_DRB1_71  | 7421.53715  | 7  | -1603.1639 | aa1 TI aa2 KAER      |
| AA_DQB1_67  | AA_DRB1_11  | 7421.021835 | 11 | -1597.1103 | aa1 IV aa2 SPVLGD    |
| AA_DQB1_66  | AA_DRB1_11  | 7421.021835 | 11 | -1597.1103 | aa1 DE aa2 SPVLGD    |
| AA_DQB1_71  | AA_DQB1_57  | 7389.861665 | 7  | -1596.2903 | aa1 KTAD aa2 ADVS    |
| AA_DQB1_-18 | AA_DRB1_71  | 7382.667329 | 11 | -1588.7918 | aa1 AVx aa2 KAER     |
| AA_DQA1_52  | AA_DQB1_167 | 7363.8063   | 5  | -1593.8046 | aa1 RSH aa2 RH       |
| AA_DQA1_52  | AA_DQB1_13  | 7361.576811 | 5  | -1593.3206 | aa1 RSH aa2 GA       |
| AA_DRB1_26  | AA_DRB1_13  | 7354.631484 | 8  | -1587.1191 | aa1 YFL aa2 SRHFGY   |
| AA_DQA1_52  | AA_DQB1_45  | 7353.177516 | 4  | -1593.1566 | aa1 RSH aa2 GE       |



|             |             |             |    |            |                     |
|-------------|-------------|-------------|----|------------|---------------------|
| AA_DRB1_96  | AA_DRB1_70  | 7348.239491 | 9  | -1584.2371 | aa1 HQYE aa2 QDR    |
| AA_DQB1_125 | AA_DRB1_70  | 7313.373702 | 7  | -1579.6925 | aa1 AGS aa2 QDR     |
| AA_DRB1_71  | AA_DRB1_11  | 7302.464427 | 11 | -1571.3973 | aa1 KAER aa2 SPVLGD |
| AA_DRB1_71  | AA_DRB1_-24 | 7290.619552 | 9  | -1571.7371 | aa1 KAER aa2 LFX    |
| AA_DQB1_67  | AA_DQB1_57  | 7274.072853 | 5  | -1574.3272 | aa1 IV aa2 ADVS     |
| AA_DQB1_66  | AA_DQB1_57  | 7274.072853 | 5  | -1574.3272 | aa1 DE aa2 ADVS     |
| AA_DRB1_77  | AA_DRB1_13  | 7267.766167 | 6  | -1571.3554 | aa1 NT aa2 SRHFGY   |
| AA_DRB1_73  | AA_DRB1_13  | 7267.766167 | 6  | -1571.3554 | aa1 GA aa2 SRHFGY   |
| AA_DQB1_167 | AA_DRB1_11  | 7263.989139 | 10 | -1564.4944 | aa1 RH aa2 SPVLGD   |
| AA_DQB1_13  | AA_DRB1_11  | 7261.231498 | 10 | -1563.8962 | aa1 GA aa2 SPVLGD   |
| AA_DQB1_45  | AA_DRB1_11  | 7257.128925 | 10 | -1563.0063 | aa1 GE aa2 SPVLGD   |
| AA_DQB1_37  | AA_DRB1_11  | 7256.620572 | 12 | -1560.0352 | aa1 IYD aa2 SPVLGD  |
| AA_DQB1_75  | AA_DRB1_13  | 7256.520167 | 11 | -1561.433  | aa1 VL aa2 SRHFGY   |

Supplementary Table 7B. Top 100 combinations of 3AA's

| AA1         | AA2         | AA3         | DeltaDeviance | df | P           | Residues                       |
|-------------|-------------|-------------|---------------|----|-------------|--------------------------------|
| AA_DQB1_57  | AA_DRB1_71  | AA_DRB1_13  | 10148.52492   | 31 | -2161.51987 | aa1 ADVS aa2 KAER aa3 SRHFGY   |
| AA_DQB1_57  | AA_DRB1_86  | AA_DRB1_13  | 10124.62638   | 29 | -2158.88828 | aa1 ADVS aa2 VG aa3 SRHFGY     |
| AA_DQB1_-18 | AA_DRB1_71  | AA_DRB1_37  | 10045.15659   | 25 | -2146.85261 | aa1 AVx aa2 KAER aa3 NSYFL     |
| AA_DQB1_57  | AA_DRB1_74  | AA_DRB1_11  | 9987.049638   | 31 | -2126.55694 | aa1 ADVS aa2 RALQE aa3 SPVLGD  |
| AA_DQB1_57  | AA_DRB1_74  | AA_DRB1_13  | 9962.368443   | 31 | -2121.21307 | aa1 ADVS aa2 RALQE aa3 SRHFGY  |
| AA_DQB1_71  | AA_DQB1_-18 | AA_DRB1_13  | 9948.308347   | 32 | -2116.91211 | aa1 KTAD aa2 AVx aa3 SRHFGY    |
| AA_DQB1_71  | AA_DQB1_-18 | AA_DRB1_11  | 9945.712378   | 30 | -2118.8707  | aa1 KTAD aa2 AVx aa3 SPVLGD    |
| AA_DQB1_74  | AA_DQB1_-18 | AA_DRB1_13  | 9943.814444   | 27 | -2122.29737 | aa1 AES aa2 AVx aa3 SRHFGY     |
| AA_DQB1_57  | AA_DRB1_86  | AA_DRB1_37  | 9941.233586   | 27 | -2121.73836 | aa1 ADVS aa2 VG aa3 NSYFL      |
| AA_DQB1_75  | AA_DQB1_-18 | AA_DRB1_13  | 9938.438515   | 26 | -2122.42833 | aa1 VL aa2 AVx aa3 SRHFGY      |
| AA_DQB1_26  | AA_DQB1_-10 | AA_DRB1_13  | 9937.416871   | 26 | -2122.20702 | aa1 LYG aa2 SAx aa3 SRHFGY     |
| AA_DQB1_26  | AA_DQB1_-18 | AA_DRB1_13  | 9937.416871   | 26 | -2122.20702 | aa1 LYG aa2 AVx aa3 SRHFGY     |
| AA_DQB1_-18 | AA_DRB1_71  | AA_DRB1_13  | 9921.150843   | 26 | -2118.68343 | aa1 AVx aa2 KAER aa3 SRHFGY    |
| AA_DQB1_77  | AA_DQB1_-18 | AA_DRB1_13  | 9920.94159    | 26 | -2118.6381  | aa1 RT aa2 AVx aa3 SRHFGY      |
| AA_DQB1_57  | AA_DQB1_26  | AA_DRB1_13  | 9919.325229   | 36 | -2105.681   | aa1 ADVS aa2 LYG aa3 SRHFGY    |
| AA_DQB1_38  | AA_DQB1_-18 | AA_DRB1_13  | 9917.652795   | 26 | -2117.92568 | aa1 VA aa2 AVx aa3 SRHFGY      |
| AA_DQB1_57  | AA_DQB1_-18 | AA_DRB1_13  | 9913.173462   | 33 | -2108.05674 | aa1 ADVS aa2 AVx aa3 SRHFGY    |
| AA_DQB1_71  | AA_DQB1_57  | AA_DRB1_11  | 9895.272334   | 32 | -2105.4303  | aa1 KTAD aa2 ADVS aa3 SPVLGD   |
| AA_DQB1_57  | AA_DRB1_86  | AA_DRB1_11  | 9878.48074    | 27 | -2108.14612 | aa1 ADVS aa2 VG aa3 SPVLGD     |
| AA_DQB1_57  | AA_DRB1_67  | AA_DRB1_13  | 9877.598178   | 32 | -2101.60405 | aa1 ADVS aa2 LIF aa3 SRHFGY    |
| AA_DQB1_57  | AA_DRB1_37  | AA_DRB1_13  | 9874.77381    | 30 | -2103.5101  | aa1 ADVS aa2 NSYFL aa3 SRHFGY  |
| AA_DQB1_57  | AA_DRB1_71  | AA_DRB1_37  | 9860.880401   | 30 | -2100.50175 | aa1 ADVS aa2 KAER aa3 NSYFL    |
| AA_DQB1_-18 | AA_DRB1_67  | AA_DRB1_13  | 9853.196755   | 27 | -2102.66968 | aa1 AVx aa2 LIF aa3 SRHFGY     |
| AA_DQB1_70  | AA_DQB1_57  | AA_DRB1_11  | 9852.082476   | 30 | -2098.59673 | aa1 RGE aa2 ADVS aa3 SPVLGD    |
| AA_DQB1_26  | AA_DRB1_71  | AA_DRB1_13  | 9849.506749   | 30 | -2098.03901 | aa1 LYG aa2 KAER aa3 SRHFGY    |
| AA_DQB1_57  | AA_DRB1_57  | AA_DRB1_13  | 9847.747922   | 31 | -2096.3964  | aa1 ADVS aa2 DVA aa3 SRHFGY    |
| AA_DQB1_30  | AA_DQB1_-18 | AA_DRB1_13  | 9846.931118   | 27 | -2101.31257 | aa1 SYH aa2 AVx aa3 SRHFGY     |
| AA_DQB1_185 | AA_DQB1_57  | AA_DRB1_11  | 9846.666692   | 26 | -2102.54867 | aa1 TI aa2 ADVS aa3 SPVLGD     |
| AA_DQB1_67  | AA_DQB1_57  | AA_DRB1_11  | 9844.169272   | 26 | -2102.00769 | aa1 IV aa2 ADVS aa3 SPVLGD     |
| AA_DQB1_66  | AA_DQB1_57  | AA_DRB1_11  | 9844.169272   | 26 | -2102.00769 | aa1 DE aa2 ADVS aa3 SPVLGD     |
| AA_DQB1_57  | AA_DRB1_74  | AA_DRB1_71  | 9841.332662   | 24 | -2104.00616 | aa1 ADVS aa2 RALQE aa3 KAER    |
| AA_DQB1_57  | AA_DRB1_181 | AA_DRB1_13  | 9839.466174   | 23 | -2104.92214 | aa1 ADVS aa2 TxM aa3 SRHFGY    |
| AA_DQB1_-18 | AA_DRB1_70  | AA_DRB1_13  | 9839.076178   | 26 | -2100.90443 | aa1 AVx aa2 QDR aa3 SRHFGY     |
| AA_DQB1_71  | AA_DQB1_57  | AA_DRB1_13  | 9838.411893   | 35 | -2089.39892 | aa1 KTAD aa2 ADVS aa3 SRHFGY   |
| AA_DQB1_57  | AA_DRB1_13  | AA_DRB1_-17 | 9837.778761   | 25 | -2101.92525 | aa1 ADVS aa2 SRHFGY aa3 ATx    |
| AA_DQB1_75  | AA_DQB1_57  | AA_DRB1_13  | 9837.003146   | 32 | -2092.81577 | aa1 VL aa2 ADVS aa3 SRHFGY     |
| AA_DQB1_74  | AA_DQB1_57  | AA_DRB1_13  | 9836.545077   | 32 | -2092.71661 | aa1 AES aa2 ADVS aa3 SRHFGY    |
| AA_DQB1_57  | AA_DQB1_13  | AA_DRB1_13  | 9835.79373    | 27 | -2098.90026 | aa1 ADVS aa2 GA aa3 SRHFGY     |
| AA_DQB1_167 | AA_DQB1_57  | AA_DRB1_13  | 9834.898754   | 26 | -2099.99953 | aa1 RH aa2 ADVS aa3 SRHFGY     |
| AA_DQB1_57  | AA_DQB1_-5  | AA_DRB1_13  | 9830.63102    | 34 | -2088.94878 | aa1 ADVS aa2 PLSx aa3 SRHFGY   |
| AA_DQB1_185 | AA_DQB1_57  | AA_DRB1_13  | 9830.48712    | 29 | -2095.18957 | aa1 TI aa2 ADVS aa3 SRHFGY     |
| AA_DQB1_57  | AA_DQB1_9   | AA_DRB1_11  | 9829.398728   | 24 | -2101.42053 | aa1 ADVS aa2 YFL aa3 SPVLGD    |
| AA_DQA1_175 | AA_DQB1_57  | AA_DRB1_37  | 9829.272123   | 27 | -2097.48771 | aa1 KQE aa2 ADVS aa3 NSYFL     |
| AA_DQB1_57  | AA_DRB1_71  | AA_DRB1_11  | 9827.752845   | 30 | -2093.32865 | aa1 ADVS aa2 KAER aa3 SPVLGD   |
| AA_DQB1_57  | AA_DQB1_56  | AA_DRB1_11  | 9826.880899   | 22 | -2103.5251  | aa1 ADVS aa2 PL aa3 SPVLGD     |
| AA_DQB1_57  | AA_DRB1_60  | AA_DRB1_13  | 9823.396243   | 26 | -2097.50789 | aa1 ADVS aa2 YSH aa3 SRHFGY    |
| AA_DQB1_57  | AA_DRB1_180 | AA_DRB1_11  | 9819.456296   | 25 | -2097.95589 | aa1 ADVS aa2 VLx aa3 SPVLGD    |
| AA_DQB1_57  | AA_DQB1_45  | AA_DRB1_13  | 9817.955714   | 27 | -2095.03663 | aa1 ADVS aa2 GE aa3 SRHFGY     |
| AA_DQB1_57  | AA_DRB1_181 | AA_DRB1_11  | 9817.721847   | 21 | -2102.88039 | aa1 ADVS aa2 TxM aa3 SPVLGD    |
| AA_DQB1_57  | AA_DRB1_70  | AA_DRB1_13  | 9815.851225   | 33 | -2086.98989 | aa1 ADVS aa2 QDR aa3 SRHFGY    |
| AA_DQA1_175 | AA_DQB1_57  | AA_DRB1_11  | 9814.27034    | 32 | -2087.89448 | aa1 KQE aa2 ADVS aa3 SPVLGD    |
| AA_DQB1_57  | AA_DRB1_71  | AA_DRB1_-24 | 9810.683359   | 26 | -2094.75407 | aa1 ADVS aa2 KAER aa3 Lfx      |
| AA_DQB1_57  | AA_DRB1_30  | AA_DRB1_13  | 9808.205314   | 23 | -2098.14844 | aa1 ADVS aa2 YCLRGH aa3 SRHFGY |
| AA_DQB1_57  | AA_DRB1_13  | AA_DRB1_-16 | 9801.241117   | 26 | -2092.70873 | aa1 ADVS aa2 SRHFGY aa3 Vax    |

|             |             |             |             |    |             |                             |
|-------------|-------------|-------------|-------------|----|-------------|-----------------------------|
| AA_DQB1_57  | AA_DRB1_13  | AA_DRB1_-25 | 9801.241117 | 26 | -2092.70873 | aa1 ADVS aa2 SRHFGY aa3 RKx |
| AA_DQB1_57  | AA_DQB1_-9  | AA_DRB1_13  | 9797.435732 | 29 | -2088.03229 | aa1 ADVS aa2 Mix aa3 SRHFGY |
| AA_DQB1_57  | AA_DQB1_-27 | AA_DRB1_13  | 9797.435732 | 29 | -2088.03229 | aa1 ADVS aa2 ASx aa3 SRHFGY |
| AA_DQB1_57  | AA_DRB1_180 | AA_DRB1_71  | 9797.37264  | 21 | -2098.47018 | aa1 ADVS aa2 VLx aa3 KAER   |
| AA_DQB1_57  | AA_DRB1_231 | AA_DRB1_13  | 9796.745934 | 23 | -2095.6654  | aa1 ADVS aa2 QxP aa3 SRHFGY |
| AA_DQB1_57  | AA_DQB1_9   | AA_DRB1_13  | 9795.17846  | 26 | -2091.39546 | aa1 ADVS aa2 YFL aa3 SRHFGY |
| AA_DQA1_69  | AA_DQB1_57  | AA_DRB1_11  | 9795.161426 | 30 | -2086.2717  | aa1 LAT aa2 ADVS aa3 SPVLGD |
| AA_DQA1_75  | AA_DQB1_57  | AA_DRB1_13  | 9793.40984  | 29 | -2087.16049 | aa1 SI aa2 ADVS aa3 SRHFGY  |
| AA_DQA1_107 | AA_DQB1_57  | AA_DRB1_13  | 9793.40984  | 29 | -2087.16049 | aa1 IT aa2 ADVS aa3 SRHFGY  |
| AA_DQA1_156 | AA_DQB1_57  | AA_DRB1_13  | 9793.40984  | 29 | -2087.16049 | aa1 LF aa2 ADVS aa3 SRHFGY  |
| AA_DQA1_161 | AA_DQB1_57  | AA_DRB1_13  | 9793.40984  | 29 | -2087.16049 | aa1 ED aa2 ADVS aa3 SRHFGY  |
| AA_DQA1_163 | AA_DQB1_57  | AA_DRB1_13  | 9793.40984  | 29 | -2087.16049 | aa1 SI aa2 ADVS aa3 SRHFGY  |
| AA_DQB1_57  | AA_DRB1_86  | AA_DRB1_9   | 9788.549018 | 17 | -2102.03028 | aa1 ADVS aa2 VG aa3 EWK     |
| AA_DQB1_67  | AA_DQB1_57  | AA_DRB1_13  | 9788.543704 | 28 | -2087.38244 | aa1 IV aa2 ADVS aa3 SRHFGY  |
| AA_DQB1_66  | AA_DQB1_57  | AA_DRB1_13  | 9788.543704 | 28 | -2087.38244 | aa1 DE aa2 ADVS aa3 SRHFGY  |
| AA_DQB1_57  | AA_DRB1_26  | AA_DRB1_13  | 9779.927276 | 25 | -2089.39241 | aa1 ADVS aa2 YFL aa3 SRHFGY |
| AA_DQB1_30  | AA_DQB1_-18 | AA_DRB1_11  | 9778.261278 | 26 | -2087.73095 | aa1 SYH aa2 AVx aa3 SPVLGD  |
| AA_DQB1_57  | AA_DRB1_47  | AA_DRB1_13  | 9777.25455  | 26 | -2087.51288 | aa1 ADVS aa2 FY aa3 SRHFGY  |
| AA_DQB1_57  | AA_DRB1_37  | AA_DRB1_-16 | 9776.613635 | 25 | -2088.67456 | aa1 ADVS aa2 NSYFL aa3 VAX  |
| AA_DQB1_57  | AA_DRB1_37  | AA_DRB1_-25 | 9776.613635 | 25 | -2088.67456 | aa1 ADVS aa2 NSYFL aa3 RKx  |
| AA_DQB1_71  | AA_DQB1_57  | AA_DRB1_71  | 9772.876528 | 26 | -2086.56454 | aa1 KTAD aa2 ADVS aa3 KAER  |
| AA_DQA1_47  | AA_DQB1_57  | AA_DQB1_9   | 9771.14175  | 15 | -2101.07008 | aa1 CRQK aa2 ADVS aa3 YFL   |
| AA_DQB1_57  | AA_DQB1_56  | AA_DRB1_13  | 9771.082976 | 24 | -2088.78585 | aa1 ADVS aa2 PL aa3 SRHFGY  |
| AA_DQB1_57  | AA_DRB1_28  | AA_DRB1_13  | 9770.924256 | 22 | -2091.39906 | aa1 ADVS aa2 DEH aa3 SRHFGY |
| AA_DQB1_57  | AA_DRB1_233 | AA_DRB1_13  | 9770.354597 | 27 | -2084.72656 | aa1 ADVS aa2 RTx aa3 SRHFGY |
| AA_DQB1_57  | AA_DRB1_189 | AA_DRB1_13  | 9769.06546  | 23 | -2089.66756 | aa1 ADVS aa2 RxS aa3 SRHFGY |
| AA_DQB1_26  | AA_DRB1_71  | AA_DRB1_37  | 9768.212989 | 26 | -2085.55435 | aa1 LYG aa2 KAER aa3 NSYFL  |
| AA_DQB1_26  | AA_DQB1_-4  | AA_DRB1_11  | 9767.804059 | 27 | -2084.17414 | aa1 LYG aa2 VLx aa3 SPVLGD  |
| AA_DQB1_26  | AA_DQB1_-5  | AA_DRB1_11  | 9767.804059 | 27 | -2084.17414 | aa1 LYG aa2 PLSx aa3 SPVLGD |
| AA_DQB1_26  | AA_DQB1_-6  | AA_DRB1_11  | 9767.804059 | 27 | -2084.17414 | aa1 LYG aa2 TSx aa3 SPVLGD  |
| AA_DQB1_26  | AA_DQB1_-21 | AA_DRB1_11  | 9767.804059 | 27 | -2084.17414 | aa1 LYG aa2 GDx aa3 SPVLGD  |
| AA_DQB1_57  | AA_DRB1_32  | AA_DRB1_13  | 9766.74347  | 24 | -2087.84566 | aa1 ADVS aa2 HY aa3 SRHFGY  |
| AA_DQB1_57  | AA_DRB1_38  | AA_DRB1_13  | 9765.697356 | 21 | -2091.60533 | aa1 ADVS aa2 VAL aa3 SRHFGY |
| AA_DQB1_167 | AA_DRB1_71  | AA_DRB1_13  | 9763.464304 | 21 | -2091.12137 | aa1 RH aa2 KAER aa3 SRHFGY  |
| AA_DQB1_57  | AA_DRB1_13  | AA_DRB1_-24 | 9762.906729 | 24 | -2087.0144  | aa1 ADVS aa2 SRHFGY aa3 LFX |
| AA_DQB1_57  | AA_DRB1_180 | AA_DRB1_13  | 9760.968322 | 24 | -2086.59442 | aa1 ADVS aa2 VLx aa3 SRHFGY |
| AA_DQB1_13  | AA_DRB1_71  | AA_DRB1_13  | 9759.772186 | 21 | -2090.3212  | aa1 GA aa2 KAER aa3 SRHFGY  |
| AA_DQA1_25  | AA_DQA1_175 | AA_DQB1_57  | 9758.539195 | 11 | -2104.16072 | aa1 YF aa2 KQE aa3 ADVS     |
| AA_DQB1_57  | AA_DRB1_180 | AA_DRB1_9   | 9758.149743 | 14 | -2099.68207 | aa1 ADVS aa2 VLx aa3 EWK    |
| AA_DQB1_57  | AA_DRB1_13  | AA_DRB1_-1  | 9758.036271 | 23 | -2087.27775 | aa1 ADVS aa2 SRHFGY aa3 ASx |
| AA_DQB1_57  | AA_DQB1_-17 | AA_DRB1_13  | 9754.853591 | 24 | -2085.26962 | aa1 ADVS aa2 AxP aa3 SRHFGY |
| AA_DQB1_-18 | AA_DRB1_96  | AA_DRB1_67  | 9745.437543 | 21 | -2087.21454 | aa1 AVx aa2 HQYE aa3 LIF    |
| AA_DQB1_45  | AA_DRB1_71  | AA_DRB1_13  | 9743.407869 | 21 | -2086.77466 | aa1 GE aa2 KAER aa3 SRHFGY  |
| AA_DQB1_57  | AA_DRB1_16  | AA_DRB1_11  | 9740.489232 | 21 | -2086.14212 | aa1 ADVS aa2 HY aa3 SPVLGD  |
| AA_DQB1_57  | AA_DRB1_85  | AA_DRB1_13  | 9731.818925 | 21 | -2084.26306 | aa1 ADVS aa2 VA aa3 SRHFGY  |

**Supplementary Table 7C. Top 100 combinations of 4AA's**

| AA1        | AA2         | AA3         | AA4         | DeltaDeviance | df | P          | Residues                            |
|------------|-------------|-------------|-------------|---------------|----|------------|-------------------------------------|
| AA_DQA1_47 | AA_DQA1_48  | AA_DQB1_57  | AA_DQB1_9   | 9771.14175    | 15 | -2101.0701 | aa1 CRQK aa2 LW aa3 ADVS aa4 YFL    |
| AA_DQA1_47 | AA_DQA1_50  | AA_DQB1_57  | AA_DQB1_9   | 9771.14175    | 15 | -2101.0701 | aa1 CRQK aa2 VEL aa3 ADVS aa4 YFL   |
| AA_DQA1_47 | AA_DQA1_51  | AA_DQB1_57  | AA_DQB1_9   | 9771.14175    | 15 | -2101.0701 | aa1 CRQK aa2 LF aa3 ADVS aa4 YFL    |
| AA_DQA1_47 | AA_DQA1_52  | AA_DQB1_57  | AA_DQB1_9   | 9771.14175    | 15 | -2101.0701 | aa1 CRQK aa2 RSH aa3 ADVS aa4 YFL   |
| AA_DQA1_47 | AA_DQA1_53  | AA_DQB1_57  | AA_DQB1_9   | 9771.14175    | 15 | -2101.0701 | aa1 CRQK aa2 QKR aa3 ADVS aa4 YFL   |
| AA_DQA1_47 | AA_DQA1_54  | AA_DQB1_57  | AA_DQB1_9   | 9771.14175    | 15 | -2101.0701 | aa1 CRQK aa2 FL aa3 ADVS aa4 YFL    |
| AA_DQA1_47 | AA_DQA1_55  | AA_DQB1_57  | AA_DQB1_9   | 9771.14175    | 15 | -2101.0701 | aa1 CRQK aa2 RG aa3 ADVS aa4 YFL    |
| AA_DQA1_47 | AA_DQA1_56  | AA_DQB1_57  | AA_DQB1_9   | 9771.14175    | 15 | -2101.0701 | aa1 CRQK aa2 xGR aa3 ADVS aa4 YFL   |
| AA_DQA1_47 | AA_DQA1_61  | AA_DQB1_57  | AA_DQB1_9   | 9771.14175    | 15 | -2101.0701 | aa1 CRQK aa2 FG aa3 ADVS aa4 YFL    |
| AA_DQA1_47 | AA_DQA1_64  | AA_DQB1_57  | AA_DQB1_9   | 9771.14175    | 15 | -2101.0701 | aa1 CRQK aa2 TR aa3 ADVS aa4 YFL    |
| AA_DQA1_47 | AA_DQA1_66  | AA_DQB1_57  | AA_DQB1_9   | 9771.14175    | 15 | -2101.0701 | aa1 CRQK aa2 IM aa3 ADVS aa4 YFL    |
| AA_DQA1_47 | AA_DQA1_69  | AA_DQA1_129 | AA_DQB1_57  | 9778.09246    | 13 | -2105.4538 | aa1 CRQK aa2 LAT aa3 HQ aa4 ADVS    |
| AA_DQA1_47 | AA_DQA1_69  | AA_DQA1_130 | AA_DQB1_57  | 9778.09246    | 13 | -2105.4538 | aa1 CRQK aa2 LAT aa3 SA aa4 ADVS    |
| AA_DQA1_47 | AA_DQA1_69  | AA_DQB1_57  | AA_DRB1_86  | 9958.228094   | 22 | -2131.9891 | aa1 CRQK aa2 LAT aa3 ADVS aa4 VG    |
| AA_DQA1_47 | AA_DQA1_69  | AA_DQB1_57  | AA_DRB1_71  | 10079.93862   | 34 | -2142.9113 | aa1 CRQK aa2 LAT aa3 ADVS aa4 KAER  |
| AA_DQA1_47 | AA_DQA1_69  | AA_DQB1_57  | AA_DRB1_70  | 9866.021177   | 28 | -2104.162  | aa1 CRQK aa2 LAT aa3 ADVS aa4 QDR   |
| AA_DQA1_47 | AA_DQA1_69  | AA_DQB1_57  | AA_DRB1_37  | 9901.428811   | 35 | -2103.0371 | aa1 CRQK aa2 LAT aa3 ADVS aa4 NSYFL |
| AA_DQA1_47 | AA_DQA1_75  | AA_DQA1_129 | AA_DQB1_57  | 9778.09246    | 13 | -2105.4538 | aa1 CRQK aa2 SI aa3 HQ aa4 ADVS     |
| AA_DQA1_47 | AA_DQA1_75  | AA_DQA1_130 | AA_DQB1_57  | 9778.09246    | 13 | -2105.4538 | aa1 CRQK aa2 SI aa3 SA aa4 ADVS     |
| AA_DQA1_47 | AA_DQA1_75  | AA_DQB1_57  | AA_DRB1_86  | 9958.228094   | 22 | -2131.9891 | aa1 CRQK aa2 SI aa3 ADVS aa4 VG     |
| AA_DQA1_47 | AA_DQA1_75  | AA_DQB1_57  | AA_DRB1_71  | 10079.93862   | 34 | -2142.9113 | aa1 CRQK aa2 SI aa3 ADVS aa4 KAER   |
| AA_DQA1_47 | AA_DQA1_75  | AA_DQB1_57  | AA_DRB1_70  | 9866.021177   | 28 | -2104.162  | aa1 CRQK aa2 SI aa3 ADVS aa4 QDR    |
| AA_DQA1_47 | AA_DQA1_75  | AA_DQB1_57  | AA_DRB1_37  | 9901.428811   | 35 | -2103.0371 | aa1 CRQK aa2 SI aa3 ADVS aa4 NSYFL  |
| AA_DQA1_47 | AA_DQA1_76  | AA_DQB1_57  | AA_DQB1_9   | 9771.14175    | 15 | -2101.0701 | aa1 CRQK aa2 LMV aa3 ADVS aa4 YFL   |
| AA_DQA1_47 | AA_DQA1_80  | AA_DQB1_57  | AA_DQB1_9   | 9771.14175    | 15 | -2101.0701 | aa1 CRQK aa2 SY aa3 ADVS aa4 YFL    |
| AA_DQA1_47 | AA_DQA1_107 | AA_DQA1_129 | AA_DQB1_57  | 9778.09246    | 13 | -2105.4538 | aa1 CRQK aa2 IT aa3 HQ aa4 ADVS     |
| AA_DQA1_47 | AA_DQA1_107 | AA_DQA1_130 | AA_DQB1_57  | 9778.09246    | 13 | -2105.4538 | aa1 CRQK aa2 IT aa3 SA aa4 ADVS     |
| AA_DQA1_47 | AA_DQA1_107 | AA_DQB1_57  | AA_DRB1_86  | 9958.228094   | 22 | -2131.9891 | aa1 CRQK aa2 IT aa3 ADVS aa4 VG     |
| AA_DQA1_47 | AA_DQA1_107 | AA_DQB1_57  | AA_DRB1_71  | 10079.93862   | 34 | -2142.9113 | aa1 CRQK aa2 IT aa3 ADVS aa4 KAER   |
| AA_DQA1_47 | AA_DQA1_107 | AA_DQB1_57  | AA_DRB1_70  | 9866.021177   | 28 | -2104.162  | aa1 CRQK aa2 IT aa3 ADVS aa4 QDR    |
| AA_DQA1_47 | AA_DQA1_107 | AA_DQB1_57  | AA_DRB1_37  | 9901.428811   | 35 | -2103.0371 | aa1 CRQK aa2 IT aa3 ADVS aa4 NSYFL  |
| AA_DQA1_47 | AA_DQA1_129 | AA_DQA1_156 | AA_DQB1_57  | 9778.09246    | 13 | -2105.4538 | aa1 CRQK aa2 HQ aa3 LF aa4 ADVS     |
| AA_DQA1_47 | AA_DQA1_129 | AA_DQA1_161 | AA_DQB1_57  | 9778.09246    | 13 | -2105.4538 | aa1 CRQK aa2 HQ aa3 ED aa4 ADVS     |
| AA_DQA1_47 | AA_DQA1_129 | AA_DQA1_163 | AA_DQB1_57  | 9778.09246    | 13 | -2105.4538 | aa1 CRQK aa2 HQ aa3 SI aa4 ADVS     |
| AA_DQA1_47 | AA_DQA1_129 | AA_DQA1_175 | AA_DQB1_57  | 9778.09246    | 13 | -2105.4538 | aa1 CRQK aa2 HQ aa3 KQE aa4 ADVS    |
| AA_DQA1_47 | AA_DQA1_129 | AA_DQB1_185 | AA_DQB1_57  | 9859.678114   | 18 | -2116.0641 | aa1 CRQK aa2 HQ aa3 TI aa4 ADVS     |
| AA_DQA1_47 | AA_DQA1_129 | AA_DQB1_167 | AA_DQB1_57  | 9860.41582    | 17 | -2117.6121 | aa1 CRQK aa2 HQ aa3 RH aa4 ADVS     |
| AA_DQA1_47 | AA_DQA1_129 | AA_DQB1_75  | AA_DQB1_57  | 9818.668311   | 21 | -2103.0855 | aa1 CRQK aa2 HQ aa3 VL aa4 ADVS     |
| AA_DQA1_47 | AA_DQA1_129 | AA_DQB1_74  | AA_DQB1_57  | 9817.806051   | 21 | -2102.8986 | aa1 CRQK aa2 HQ aa3 AES aa4 ADVS    |
| AA_DQA1_47 | AA_DQA1_129 | AA_DQB1_71  | AA_DQB1_57  | 9817.806051   | 21 | -2102.8986 | aa1 CRQK aa2 HQ aa3 KTAD aa4 ADVS   |
| AA_DQA1_47 | AA_DQA1_129 | AA_DQB1_70  | AA_DQB1_57  | 9817.45218    | 18 | -2106.9097 | aa1 CRQK aa2 HQ aa3 RGE aa4 ADVS    |
| AA_DQA1_47 | AA_DQA1_129 | AA_DQB1_67  | AA_DQB1_57  | 9817.135281   | 20 | -2104.1042 | aa1 CRQK aa2 HQ aa3 IV aa4 ADVS     |
| AA_DQA1_47 | AA_DQA1_129 | AA_DQB1_66  | AA_DQB1_57  | 9817.135281   | 20 | -2104.1042 | aa1 CRQK aa2 HQ aa3 DE aa4 ADVS     |
| AA_DQA1_47 | AA_DQA1_129 | AA_DQB1_57  | AA_DQB1_56  | 9815.838125   | 14 | -2112.1936 | aa1 CRQK aa2 HQ aa3 ADVS aa4 PL     |
| AA_DQA1_47 | AA_DQA1_129 | AA_DQB1_57  | AA_DQB1_55  | 9815.482941   | 18 | -2106.4828 | aa1 CRQK aa2 HQ aa3 ADVS aa4 LRP    |
| AA_DQA1_47 | AA_DQA1_129 | AA_DQB1_57  | AA_DQB1_45  | 9860.372614   | 16 | -2119.0045 | aa1 CRQK aa2 HQ aa3 ADVS aa4 GE     |
| AA_DQA1_47 | AA_DQA1_129 | AA_DQB1_57  | AA_DQB1_26  | 9868.620999   | 23 | -2111.2395 | aa1 CRQK aa2 HQ aa3 ADVS aa4 LYG    |
| AA_DQA1_47 | AA_DQA1_129 | AA_DQB1_57  | AA_DQB1_13  | 9861.306357   | 18 | -2116.417  | aa1 CRQK aa2 HQ aa3 ADVS aa4 GA     |
| AA_DQA1_47 | AA_DQA1_129 | AA_DQB1_57  | AA_DQB1_9   | 9824.92838    | 18 | -2108.5305 | aa1 CRQK aa2 HQ aa3 ADVS aa4 YFL    |
| AA_DQA1_47 | AA_DQA1_129 | AA_DQB1_57  | AA_DQB1_-18 | 9875.680826   | 22 | -2114.1004 | aa1 CRQK aa2 HQ aa3 ADVS aa4 AVx    |
| AA_DQA1_47 | AA_DQA1_129 | AA_DQB1_57  | AA_DRB1_181 | 9898.38857    | 20 | -2121.7159 | aa1 CRQK aa2 HQ aa3 ADVS aa4 TxM    |
| AA_DQA1_47 | AA_DQA1_129 | AA_DQB1_57  | AA_DRB1_180 | 9859.91856    | 19 | -2114.7408 | aa1 CRQK aa2 HQ aa3 ADVS aa4 VLx    |
| AA_DQA1_47 | AA_DQA1_129 | AA_DQB1_57  | AA_DRB1_86  | 9861.779059   | 21 | -2112.4288 | aa1 CRQK aa2 HQ aa3 ADVS aa4 VG     |
| AA_DQA1_47 | AA_DQA1_130 | AA_DQA1_156 | AA_DQB1_57  | 9778.09246    | 13 | -2105.4538 | aa1 CRQK aa2 SA aa3 LF aa4 ADVS     |
| AA_DQA1_47 | AA_DQA1_130 | AA_DQA1_161 | AA_DQB1_57  | 9778.09246    | 13 | -2105.4538 | aa1 CRQK aa2 SA aa3 ED aa4 ADVS     |
| AA_DQA1_47 | AA_DQA1_130 | AA_DQA1_163 | AA_DQB1_57  | 9778.09246    | 13 | -2105.4538 | aa1 CRQK aa2 SA aa3 SI aa4 ADVS     |
| AA_DQA1_47 | AA_DQA1_130 | AA_DQA1_175 | AA_DQB1_57  | 9778.09246    | 13 | -2105.4538 | aa1 CRQK aa2 SA aa3 KQE aa4 ADVS    |

|            |             |             |             |             |    |            |     |      |     |     |     |      |     |       |
|------------|-------------|-------------|-------------|-------------|----|------------|-----|------|-----|-----|-----|------|-----|-------|
| AA_DQA1_47 | AA_DQA1_130 | AA_DQB1_185 | AA_DQB1_57  | 9859.678114 | 18 | -2116.0641 | aa1 | CRQK | aa2 | SA  | aa3 | TI   | aa4 | ADVS  |
| AA_DQA1_47 | AA_DQA1_130 | AA_DQB1_167 | AA_DQB1_57  | 9860.41582  | 17 | -2117.6121 | aa1 | CRQK | aa2 | SA  | aa3 | RH   | aa4 | ADVS  |
| AA_DQA1_47 | AA_DQA1_130 | AA_DQB1_75  | AA_DQB1_57  | 9818.668311 | 21 | -2103.0855 | aa1 | CRQK | aa2 | SA  | aa3 | VL   | aa4 | ADVS  |
| AA_DQA1_47 | AA_DQA1_130 | AA_DQB1_74  | AA_DQB1_57  | 9817.806051 | 21 | -2102.8986 | aa1 | CRQK | aa2 | SA  | aa3 | AES  | aa4 | ADVS  |
| AA_DQA1_47 | AA_DQA1_130 | AA_DQB1_71  | AA_DQB1_57  | 9817.806051 | 21 | -2102.8986 | aa1 | CRQK | aa2 | SA  | aa3 | KTAD | aa4 | ADVS  |
| AA_DQA1_47 | AA_DQA1_130 | AA_DQB1_70  | AA_DQB1_57  | 9817.45218  | 18 | -2106.9097 | aa1 | CRQK | aa2 | SA  | aa3 | RGE  | aa4 | ADVS  |
| AA_DQA1_47 | AA_DQA1_130 | AA_DQB1_67  | AA_DQB1_57  | 9817.135281 | 20 | -2104.1042 | aa1 | CRQK | aa2 | SA  | aa3 | IV   | aa4 | ADVS  |
| AA_DQA1_47 | AA_DQA1_130 | AA_DQB1_66  | AA_DQB1_57  | 9817.135281 | 20 | -2104.1042 | aa1 | CRQK | aa2 | SA  | aa3 | DE   | aa4 | ADVS  |
| AA_DQA1_47 | AA_DQA1_130 | AA_DQB1_57  | AA_DQB1_56  | 9815.838125 | 14 | -2112.1936 | aa1 | CRQK | aa2 | SA  | aa3 | ADVS | aa4 | PL    |
| AA_DQA1_47 | AA_DQA1_130 | AA_DQB1_57  | AA_DQB1_55  | 9815.482941 | 18 | -2106.4828 | aa1 | CRQK | aa2 | SA  | aa3 | ADVS | aa4 | LRP   |
| AA_DQA1_47 | AA_DQA1_130 | AA_DQB1_57  | AA_DQB1_45  | 9860.372614 | 16 | -2119.0045 | aa1 | CRQK | aa2 | SA  | aa3 | ADVS | aa4 | GE    |
| AA_DQA1_47 | AA_DQA1_130 | AA_DQB1_57  | AA_DQB1_26  | 9868.620999 | 23 | -2111.2395 | aa1 | CRQK | aa2 | SA  | aa3 | ADVS | aa4 | LYG   |
| AA_DQA1_47 | AA_DQA1_130 | AA_DQB1_57  | AA_DQB1_13  | 9861.306357 | 18 | -2116.417  | aa1 | CRQK | aa2 | SA  | aa3 | ADVS | aa4 | GA    |
| AA_DQA1_47 | AA_DQA1_130 | AA_DQB1_57  | AA_DQB1_9   | 9824.92838  | 18 | -2108.5305 | aa1 | CRQK | aa2 | SA  | aa3 | ADVS | aa4 | YFL   |
| AA_DQA1_47 | AA_DQA1_130 | AA_DQB1_57  | AA_DQB1_-18 | 9875.680826 | 22 | -2114.1004 | aa1 | CRQK | aa2 | SA  | aa3 | ADVS | aa4 | AVx   |
| AA_DQA1_47 | AA_DQA1_130 | AA_DQB1_57  | AA_DRB1_181 | 9898.38857  | 20 | -2121.7159 | aa1 | CRQK | aa2 | SA  | aa3 | ADVS | aa4 | TxM   |
| AA_DQA1_47 | AA_DQA1_130 | AA_DQB1_57  | AA_DRB1_180 | 9859.91856  | 19 | -2114.7408 | aa1 | CRQK | aa2 | SA  | aa3 | ADVS | aa4 | VLx   |
| AA_DQA1_47 | AA_DQA1_130 | AA_DQB1_57  | AA_DRB1_86  | 9861.779059 | 21 | -2112.4288 | aa1 | CRQK | aa2 | SA  | aa3 | ADVS | aa4 | VG    |
| AA_DQA1_47 | AA_DQA1_156 | AA_DQB1_57  | AA_DRB1_86  | 9958.228094 | 22 | -2131.9891 | aa1 | CRQK | aa2 | LF  | aa3 | ADVS | aa4 | VG    |
| AA_DQA1_47 | AA_DQA1_156 | AA_DQB1_57  | AA_DRB1_71  | 10079.93862 | 34 | -2142.9113 | aa1 | CRQK | aa2 | LF  | aa3 | ADVS | aa4 | KAER  |
| AA_DQA1_47 | AA_DQA1_156 | AA_DQB1_57  | AA_DRB1_70  | 9866.021177 | 28 | -2104.162  | aa1 | CRQK | aa2 | LF  | aa3 | ADVS | aa4 | QDR   |
| AA_DQA1_47 | AA_DQA1_156 | AA_DQB1_57  | AA_DRB1_37  | 9901.428811 | 35 | -2103.0371 | aa1 | CRQK | aa2 | LF  | aa3 | ADVS | aa4 | NSYFL |
| AA_DQA1_47 | AA_DQA1_161 | AA_DQB1_57  | AA_DRB1_86  | 9958.228094 | 22 | -2131.9891 | aa1 | CRQK | aa2 | ED  | aa3 | ADVS | aa4 | VG    |
| AA_DQA1_47 | AA_DQA1_161 | AA_DQB1_57  | AA_DRB1_71  | 10079.93862 | 34 | -2142.9113 | aa1 | CRQK | aa2 | ED  | aa3 | ADVS | aa4 | KAER  |
| AA_DQA1_47 | AA_DQA1_161 | AA_DQB1_57  | AA_DRB1_70  | 9866.021177 | 28 | -2104.162  | aa1 | CRQK | aa2 | ED  | aa3 | ADVS | aa4 | QDR   |
| AA_DQA1_47 | AA_DQA1_161 | AA_DQB1_57  | AA_DRB1_37  | 9901.428811 | 35 | -2103.0371 | aa1 | CRQK | aa2 | ED  | aa3 | ADVS | aa4 | NSYFL |
| AA_DQA1_47 | AA_DQA1_163 | AA_DQB1_57  | AA_DRB1_86  | 9958.228094 | 22 | -2131.9891 | aa1 | CRQK | aa2 | SI  | aa3 | ADVS | aa4 | VG    |
| AA_DQA1_47 | AA_DQA1_163 | AA_DQB1_57  | AA_DRB1_71  | 10079.93862 | 34 | -2142.9113 | aa1 | CRQK | aa2 | SI  | aa3 | ADVS | aa4 | KAER  |
| AA_DQA1_47 | AA_DQA1_163 | AA_DQB1_57  | AA_DRB1_70  | 9866.021177 | 28 | -2104.162  | aa1 | CRQK | aa2 | SI  | aa3 | ADVS | aa4 | QDR   |
| AA_DQA1_47 | AA_DQA1_163 | AA_DQB1_57  | AA_DRB1_37  | 9901.428811 | 35 | -2103.0371 | aa1 | CRQK | aa2 | SI  | aa3 | ADVS | aa4 | NSYFL |
| AA_DQA1_47 | AA_DQA1_175 | AA_DQB1_57  | AA_DRB1_86  | 9958.228094 | 22 | -2131.9891 | aa1 | CRQK | aa2 | KQE | aa3 | ADVS | aa4 | VG    |
| AA_DQA1_47 | AA_DQA1_175 | AA_DQB1_57  | AA_DRB1_71  | 10079.93862 | 34 | -2142.9113 | aa1 | CRQK | aa2 | KQE | aa3 | ADVS | aa4 | KAER  |
| AA_DQA1_47 | AA_DQA1_175 | AA_DQB1_57  | AA_DRB1_70  | 9866.021177 | 28 | -2104.162  | aa1 | CRQK | aa2 | KQE | aa3 | ADVS | aa4 | QDR   |
| AA_DQA1_47 | AA_DQA1_175 | AA_DQB1_57  | AA_DRB1_37  | 9901.428811 | 35 | -2103.0371 | aa1 | CRQK | aa2 | KQE | aa3 | ADVS | aa4 | NSYFL |
| AA_DQA1_47 | AA_DQA1_187 | AA_DQB1_57  | AA_DQB1_9   | 9771.14175  | 15 | -2101.0701 | aa1 | CRQK | aa2 | AT  | aa3 | ADVS | aa4 | YFL   |
| AA_DQA1_47 | AA_DQA1_207 | AA_DQB1_185 | AA_DQB1_57  | 9800.584983 | 20 | -2100.517  | aa1 | CRQK | aa2 | VM  | aa3 | TI   | aa4 | ADVS  |
| AA_DQA1_47 | AA_DQA1_207 | AA_DQB1_167 | AA_DQB1_57  | 9800.466847 | 20 | -2100.4913 | aa1 | CRQK | aa2 | VM  | aa3 | RH   | aa4 | ADVS  |
| AA_DQA1_47 | AA_DQA1_207 | AA_DQB1_75  | AA_DQB1_57  | 9827.191857 | 23 | -2102.2625 | aa1 | CRQK | aa2 | VM  | aa3 | VL   | aa4 | ADVS  |
| AA_DQA1_47 | AA_DQA1_207 | AA_DQB1_74  | AA_DQB1_57  | 9826.330091 | 23 | -2102.0758 | aa1 | CRQK | aa2 | VM  | aa3 | AES  | aa4 | ADVS  |
| AA_DQA1_47 | AA_DQA1_207 | AA_DQB1_71  | AA_DQB1_57  | 9826.330091 | 23 | -2102.0758 | aa1 | CRQK | aa2 | VM  | aa3 | KTAD | aa4 | ADVS  |
| AA_DQA1_47 | AA_DQA1_207 | AA_DQB1_57  | AA_DQB1_45  | 9801.282018 | 19 | -2102.0301 | aa1 | CRQK | aa2 | VM  | aa3 | ADVS | aa4 | GE    |
| AA_DQA1_47 | AA_DQA1_207 | AA_DQB1_57  | AA_DQB1_26  | 9877.140892 | 26 | -2109.15   | aa1 | CRQK | aa2 | VM  | aa3 | ADVS | aa4 | LYG   |
| AA_DQA1_47 | AA_DQA1_207 | AA_DQB1_57  | AA_DQB1_-18 | 9873.734599 | 24 | -2111.0264 | aa1 | CRQK | aa2 | VM  | aa3 | ADVS | aa4 | AVx   |
| AA_DQA1_47 | AA_DQA1_207 | AA_DQB1_57  | AA_DRB1_181 | 9839.909347 | 23 | -2105.0182 | aa1 | CRQK | aa2 | VM  | aa3 | ADVS | aa4 | TxM   |

**Supplementary Table 8. Common *HLA-DRB1-DQA1-DQB1* haplotype INFO scores**

| <b>Haplotype</b> | <b>4-digit allele</b> | <b>INFO</b>  | <b>4-digit allele</b> | <b>INFO</b>  | <b>4-digit allele</b> | <b>INFO</b>  |
|------------------|-----------------------|--------------|-----------------------|--------------|-----------------------|--------------|
| <b>1</b>         | <b>HLA-DRB1*01:01</b> | <b>0.968</b> | <b>HLA-DQA1*01:01</b> | <b>0.978</b> | <b>HLA-DQB1*05:01</b> | <b>0.982</b> |
| <b>2</b>         | <b>HLA-DRB1*03:01</b> | <b>0.991</b> | <b>HLA-DQA1*05:01</b> | <b>1.002</b> | <b>HLA-DQB1*02:01</b> | <b>0.982</b> |
| <b>3</b>         | <b>HLA-DRB1*04:01</b> | <b>0.978</b> | <b>HLA-DQA1*03:01</b> | <b>0.997</b> | <b>HLA-DQB1*03:02</b> | <b>0.985</b> |
| <b>4</b>         | <b>HLA-DRB1*04:01</b> | <b>0.978</b> | <b>HLA-DQA1*03:01</b> | <b>0.997</b> | <b>HLA-DQB1*03:01</b> | <b>1.012</b> |
| <b>5</b>         | <b>HLA-DRB1*04:04</b> | <b>0.939</b> | <b>HLA-DQA1*03:01</b> | <b>0.997</b> | <b>HLA-DQB1*03:02</b> | <b>0.985</b> |
| <b>6</b>         | <b>HLA-DRB1*07:01</b> | <b>0.997</b> | <b>HLA-DQA1*02:01</b> | <b>0.995</b> | <b>HLA-DQB1*02:02</b> | <b>1.000</b> |
| <b>7</b>         | <b>HLA-DRB1*15:01</b> | <b>1.003</b> | <b>HLA-DQA1*01:02</b> | <b>1.011</b> | <b>HLA-DQB1*06:02</b> | <b>1.002</b> |

**Supplementary Table 9. Pairwise haplotypic interactions**

| DRB1-DQA1-DQB1 Haplotype Interaction  | P value for interaction | Expected OR (additive model) | 95% CI  |         | Fold change in OR due to interaction | 95% CI |         | Total OR | 95% CI  |         |
|---------------------------------------|-------------------------|------------------------------|---------|---------|--------------------------------------|--------|---------|----------|---------|---------|
| 03:01-05:01-02:01 x 04:01-03:01-03:01 | 9.20E-11                | 3.9647                       | 2.7103  | 5.7996  | 0.3190                               | 0.2258 | 0.4507  | 1.2647   | 0.7565  | 2.1144  |
| 04:01-03:01-03:01 x 04:04-03:01-03:02 | 2.38E-06                | 3.8897                       | 2.3812  | 6.3538  | 0.2280                               | 0.1234 | 0.4214  | 0.8870   | 0.4041  | 1.9467  |
| 03:01-05:01-02:01 x 15:01-01:02-06:02 | 1.16E-05                | 0.4392                       | 0.2049  | 0.9414  | 0.0908                               | 0.0311 | 0.2654  | 0.0399   | 0.0107  | 0.1487  |
| 03:01-05:01-02:01 x 04:01-03:01-03:02 | 1.21E-05                | 15.5091                      | 10.6834 | 22.5145 | 1.9614                               | 1.4505 | 2.6523  | 30.4198  | 18.8312 | 49.1400 |
| 04:01-03:01-03:02 x 04:04-03:01-03:02 | 3.48E-05                | 15.2159                      | 9.3700  | 24.7088 | 0.3294                               | 0.1947 | 0.5573  | 5.0122   | 2.4515  | 10.2476 |
| 04:01-03:01-03:02 x 07:01-02:01-02:02 | 4.17E-05                | 1.0182                       | 0.4620  | 2.2440  | 5.0873                               | 2.3365 | 11.0767 | 5.1801   | 1.7089  | 15.7021 |
| 04:01-03:01-03:01 x 07:01-02:01-02:02 | 1.14E-04                | 0.2603                       | 0.1177  | 0.5757  | 4.7781                               | 2.1586 | 10.5765 | 1.2437   | 0.4045  | 3.8240  |
| 01:01-01:01-05:01 x 04:01-03:01-03:02 | 1.20E-04                | 5.4859                       | 4.0745  | 7.3862  | 2.1622                               | 1.4595 | 3.2031  | 11.8612  | 7.2456  | 19.4171 |
| 03:01-05:01-02:01 x 04:04-03:01-03:02 | 1.93E-04                | 7.8414                       | 5.0305  | 12.2230 | 2.1223                               | 1.4288 | 3.1523  | 16.6418  | 9.1825  | 30.1605 |
| 01:01-01:01-05:01 x 04:01-03:01-03:01 | 7.74E-04                | 1.4024                       | 1.0317  | 1.9062  | 1.9524                               | 1.3218 | 2.8838  | 2.7380   | 1.6668  | 4.4978  |
| 04:01-03:01-03:01 x 04:01-03:01-03:02 | 1.12E-03                | 7.6932                       | 5.0174  | 11.7960 | 0.4770                               | 0.3056 | 0.7444  | 3.6693   | 1.9795  | 6.8017  |
| 01:01-01:01-05:01 x 15:01-01:02-06:02 | 0.0040                  | 0.1554                       | 0.0750  | 0.3219  | 0.1365                               | 0.0352 | 0.5289  | 0.0212   | 0.0046  | 0.0987  |
| 04:01-03:01-03:02 x 15:01-01:02-06:02 | 0.0293                  | 0.8523                       | 0.3880  | 1.8720  | 0.3577                               | 0.1419 | 0.9018  | 0.3049   | 0.0905  | 1.0266  |
| 03:01-05:01-02:01 x 07:01-02:01-02:02 | 0.0316                  | 0.5247                       | 0.2440  | 1.1285  | 2.2441                               | 1.0740 | 4.6890  | 1.1776   | 0.4069  | 3.4083  |
| 04:01-03:01-03:01 x 15:01-01:02-06:02 | 0.0326                  | 0.2179                       | 0.0988  | 0.4803  | 0.2608                               | 0.0760 | 0.8944  | 0.0568   | 0.0131  | 0.2457  |
| 01:01-01:01-05:01 x 07:01-02:01-02:02 | 0.0414                  | 0.1856                       | 0.0893  | 0.3860  | 2.3193                               | 1.0335 | 5.2045  | 0.4305   | 0.1447  | 1.2810  |
| 04:04-03:01-03:02 x 07:01-02:01-02:02 | 0.0837                  | 0.5148                       | 0.2254  | 1.1761  | 2.1585                               | 0.9026 | 5.1620  | 1.1113   | 0.3343  | 3.6937  |
| 01:01-01:01-05:01 x 04:04-03:01-03:02 | 0.1908                  | 2.7737                       | 1.8914  | 4.0675  | 0.7079                               | 0.4219 | 1.1878  | 1.9636   | 1.0315  | 3.7377  |
| 04:04-03:01-03:02 x 15:01-01:02-06:02 | 0.3322                  | 0.4309                       | 0.1892  | 0.9813  | 0.6178                               | 0.2335 | 1.6351  | 0.2662   | 0.0744  | 0.9523  |
| 07:01-02:01-02:02 x 15:01-01:02-06:02 | 0.7417                  | 0.0288                       | 0.0103  | 0.0810  | 0.7757                               | 0.1713 | 3.5120  | 0.0224   | 0.0036  | 0.1394  |
| 01:01-01:01-05:01 x 03:01-05:01-02:01 | 0.7673                  | 2.8271                       | 2.2583  | 3.5392  | 1.0436                               | 0.7866 | 1.3845  | 2.9504   | 2.0562  | 4.2334  |

**Supplementary Table 10. DR3/DR4 pairwise allelic interactions**

| Allele 1   | Allele 2   | P value for interaction |
|------------|------------|-------------------------|
| DQB1*02:01 | DQB1*03:02 | 5.57E-26                |
| DRB1*03:01 | DQB1*03:02 | 5.57E-26                |
| DQA1*05:01 | DQB1*03:02 | 1.71E-25                |
| DQB1*02:01 | DRB1*04:04 | 1.49E-22                |
| DRB1*03:01 | DRB1*04:04 | 1.49E-22                |
| DQA1*05:01 | DRB1*04:04 | 1.56E-21                |
| DQB1*02:01 | DQA1*03:01 | 5.74E-06                |
| DRB1*03:01 | DQA1*03:01 | 5.74E-06                |
| DQA1*05:01 | DQA1*03:01 | 1.69E-05                |
| DQA1*05:01 | DRB1*04:01 | 0.1455                  |
| DQB1*02:01 | DRB1*04:01 | 0.19037                 |
| DRB1*03:01 | DRB1*04:01 | 0.19037                 |



## SUPPLEMENTARY NOTE

### Construction of pseudo-case/control samples

We constructed pseudo-controls from a set of 1,661 European families with at least 1 affected child and both healthy parents present. From each family, we selected one affected child (randomly selecting one if multiple affected children were present) to be the case (transmitted alleles).

We first determined the parent of origin for each of the child's two chromosomes, using heterozygous "checkpoints". Checkpoints consist of markers for which the child and only one parent are heterozygous. For example, if the mother's genotype at marker X is "AA", the father's is "AB", and the child's is "BA", we determine that the first allele at each marker came from the father. At each marker, the pseudo-case genotype is that of the affected child. Pseudo-control genotype consists of the two untransmitted allele from the parents, ordered by the parent of origin determined above. For example, if at a given marker, the father is "AA", the mother is "AB", the affected child is "AA", and the allele order in the child is determined to be mother/father, then the pseudo-control genotype must be "BA".

After applying HLA imputation, we also used the checkpoint results to identify phasing error. We observed that in about 5% of the samples, there was jumping (such that the class I segment of a chromosome in the child is from one parent, while the class II segment is from the other); no significant phasing error occurred within genes, within the class I region or within the class II region.

### Quality control

After combining the UK and Eur datasets, we excluded a total of 344 binary markers due to allele missingness or rareness (frequency < 0.05%); we correspondingly removed individuals who carried the missing or rare alleles. The post-quality control final dataset consisted of 18,832 samples, including 8,095 cases and 10,737 controls (or pseudo-controls). The gender and region of origin of each sample is provided in **Table S1**.

Imputation quality was high for each dataset, quantified here as the allelic  $R^2$  score reported by BEAGLE.

| Dataset (post-QC) | 1 <sup>st</sup> quartile | Median | Mean   | 3 <sup>rd</sup> quartile |
|-------------------|--------------------------|--------|--------|--------------------------|
| UK                | 0.9970                   | 1      | 0.9855 | 1                        |
| Eur-fam           | 0.9990                   | 1      | 0.9934 | 1                        |

**Figure S1** shows the histograms of  $R^2$  scores of all post-QC variants. **Table S2** provides the complete list of 8,617 tested binary variants and their allelic  $R^2$  scores, as well as the unadjusted disease association statistics in the total dataset, the UK case-control dataset, and the European pseudo-case/control dataset

### Accounting for population stratification

To account for population stratification, we included the 13 region codes as covariates. We had also assessed the correction by including genotype principal components (PC). We computed the PCs in the 16,086 UK case/control samples using EIGENSTRAT<sup>1</sup>,

using pruned genome-wide SNPs (excluding those on Chromosome 6). To calculate the genomic control inflation factor ( $\lambda_{GC}$ ) within the UK dataset, we tested the association to T1D in a set of 1,469 (807 after LD-pruning) SNPs in non-autoimmune loci. These SNPs were included on the ImmunoChip array as a deep replication for a study investigating the genetic basis for reading and writing ability, thus not expected to significantly associate with immune traits. We included three sets of covariates in three trials, and observed the following genomic-control factor lambda values (Q-Q plots are shown in **Figure S2**):

| Covariates included               | $\lambda_{GC}$ |
|-----------------------------------|----------------|
| No covariate                      | 1.1516         |
| Gender only                       | 1.1502         |
| Gender + top 10 PCs               | 1.1374         |
| Gender + region code              | 1.1034         |
| Gender + region code + top 10 PCs | 1.1028         |

As the including of up to 10 PCs did not significantly alter  $\lambda_{GC}$ , we elected to not include genotype principal components (PC) in our association analyses. This approach was consistent with that used for genome-wide association analysis by Onengut-Gumuscu<sup>2</sup>.

To assess the statistical significance of a specific marker, we assessed the improvement of fit of a model over the null model (only region and gender covariates) when that marker is added to the model. We calculate as the deviance defined by  $\Delta\text{Deviance}_{alt-null} = -2\ln(\text{likelihood}_{alt}/\text{likelihood}_{null})$ , which follows a  $\chi^2$  distribution with  $m-1$  degrees of freedom, from which we calculate the  $p$ -value. We considered  $p = 5 \times 10^{-8}$  as the significance threshold.

### Analysis of amino acid positions considering non-additive effect

We wanted to show that the independently associated risk-modulating amino acid positions remained unchanged after including non-additive effects. To this end, we repeated the forward-search analysis after incorporating non-additive terms into the regression model. In this analysis, each variant is coded as 0/1/2 for allelic dosage; and an additional heterozygote factor is added, which equals 1 only if the individual is heterozygous for this allele/haplotype.

### Testing for discordance effect sizes between T1D and Rheumatoid Arthritis

DRB1#13 and #71 show strong independent effects in both T1D and RA. We tested whether the individual residues at each position confer differential risk or protection between the two diseases, using previously described method<sup>3</sup>. Given a multi-allelic amino acid position with  $m$  residues, we calculated the multivariate log-odds ratios (log-OR) of the residues by including in the logistic regression the binary markers corresponding to each residue<sup>3</sup>. We excluded the most common residue in controls as the reference (therefore the log-OR and variance for that residue are both 0). Let  $a_1, a_2, \dots, a_{m-1}$  and  $b_1, b_2, \dots, b_{m-1}$  be the multivariate log-ORs in the two diseases; and let  $v_1, v_2, \dots, v_{m-1}$  and  $u_1, u_2, \dots, u_{m-1}$  be the variances around the log-OR estimates. To test the discordance of effect sizes between the two diseases, we calculated the statistic

$$\sum_{i=1 \dots m-1} \frac{(a_i - b_i)^2}{v_i + u_i}$$

This is  $\chi^2$  distributed with  $m-1$  degrees of freedom under the null.

We note that the RA and T1D datasets likely shared a proportion of control samples (from the British 1958 Birth Cohort and Blood Service). However, we do not expect inflated discordance, as had any bias been introduced by shared controls, it would tend toward artificial concordance, rather than discordance.

### Proportion of phenotypic variance explained

We assumed the liability threshold model, and calculated the proportion of phenotypic variance explained ( $h^2$ ) by a combination of variants using previously described methods<sup>4,5</sup>.

We used a model based on the biometrical model from Fisher<sup>6</sup> and the liability threshold model from Pearson and Lee<sup>7</sup>. We assumed that disease risk is the consequence of an underlying liability score; and that individuals with a score above a pre-specified threshold get disease<sup>8</sup>. We further assume that the population consists of genotype groups; and that liability score within each genotype group is normally distributed with an unknown mean and variance of 1. The value of  $h^2$  is defined by the variance between genotypic groups ( $V_g$ ) divided by the total population variance ( $V_t$ ), which equals the sum of  $V_g$  and variance within group ( $V_i = 1$ ); or,

$$h^2 = V_g / (V_g + V_i)$$

$V_g$ , the between-group variance, is defined as

$$\sum p_i (\bar{x}_i - \bar{x})^2$$

Where  $p_i$  is the population frequency of a genotypic group  $i$ ;  $\bar{x}_i$  is the mean of the group; and  $\bar{x}$  is the grand mean of the population.

To estimate the  $h^2$  explained by *HLA-DRB1-DQA1-DQB1*, we estimated the multivariate ORs of 67 haplotypes (each occurring at least four times in the dataset) defined by all amino acids in the locus, using the most common haplotype in controls as the reference. Similarly, to calculate  $h^2$  explained by *DQB1#57*, *DRβ1#13*, *DRβ1#71*, we calculated the control frequencies and multivariate ORs of 29 haplotypes (with at least four copies) defined by these three positions.

We next assumed that the alleles are in Hardy-Weinberg equilibrium, and calculated the genotype frequency ( $p_i$ ) and prevalence of disease within each possible diploid genotype ( $f_i$ ). Given that the disease is rare, relative risk approximately equals the odds ratio, therefore

$$f_i = \frac{RR_i \times F}{\sum p_i \times RR_i}$$

We then determined the liability threshold within each genotype ( $T_i$ ) using the normal inverse cumulative distribution function.

Next, we could assume that the shift of liability threshold of the reference genotype group,  $T_{ref}$ , from the population threshold is 0. Assuming equal within-genotype variance of 1, the shift in liability threshold equals the difference in the genotypic means; that is,  $\bar{x}_i = T_i - T_{ref}$ . The grand mean of the population can then be updated as  $\bar{x} = \sum p_i \times \bar{x}_i$ .

**INFO score calculation**

To assess the imputation quality of a given variant, we calculated the INFO score from the ratio of the observed variance in dosage (of the minor allele) to the expected variance under Hardy-Weinberg equilibrium<sup>9</sup>:

$$INFO = \frac{var(x)}{2p(1-p)}$$

where  $x$  is the imputed best-guess dosage and  $p$  is the frequency of the minor allele. An INFO score close to 0 indicates poor imputation quality, while a score closer to 1 indicates higher quality; a value greater than 1 is also possible. Due to the presence of non-additive effects that inflated the disease risk in heterozygotes, the allele distribution in disease cases deviated from Hardy-Weinberg equilibrium. Therefore, we calculated INFO scores using the variance and allele frequency in controls only.

## SUPPLEMENTARY NOTE REFERENCES

1. Price, A.L. *et al.* Principal components analysis corrects for stratification in genome-wide association studies. *Nat Genet* **38**, 904-9 (2006).
2. Onengut-Gumuscu, S. *et al.* Fine mapping of type 1 diabetes susceptibility loci and evidence for colocalization of causal variants with lymphoid gene enhancers. *Nat Genet* (2015).
3. Han, B. *et al.* Fine mapping seronegative and seropositive rheumatoid arthritis to shared and distinct HLA alleles by adjusting for the effects of heterogeneity. *Am J Hum Genet* **94**, 522-32 (2014).
4. Witte, J.S., Visscher, P.M. & Wray, N.R. The contribution of genetic variants to disease depends on the ruler. *Nat Rev Genet* **15**, 765-76 (2014).
5. Raychaudhuri, S. *et al.* Five amino acids in three HLA proteins explain most of the association between MHC and seropositive rheumatoid arthritis. *Nat Genet* **44**, 291-6 (2012).
6. Fisher, R.A. The correlation between relatives on the supposition of Mendelian inheritance. *Transactions of the Royal Society of Edinburgh* **52**, 399-433 (1918).
7. Pearson, K. & Lee, A. On the inheritance of characteristics not capable of exact quantitative measurement. *Philosophical Transactions of the Royal Society of London Series A*. **195**, 79-150 (1901).
8. Kwan, S.H., Purcell, S. & Sham, P.C. Genemapping through linkage and association in *Statistical Genetics* (eds. Neale, B.M., Ferreira, M.A.R., Medland, S.E. & Posthuma, D.) (Taylor & Francis, London, UK, 2007).
9. de Bakker, P.I. *et al.* Practical aspects of imputation-driven meta-analysis of genome-wide association studies. *Hum Mol Genet* **17**, R122-8 (2008).
